# Supplementary material for: Selective hydrogenation of phenols to cyclohexanols catalyzed by robust solid NHC–Rh coordination assemblies in water
Source: Royal Society of Chemistry journal article supplement (doi:10.1039/d3gc02862c), 2023-01-01
Supplement: d3gc02862c1.pdf [file d3gc02862c1.pdf]

***Electronic supplementary information (ESI) for***

**Selective hydrogenation of phenols to cyclohexanols catalyzed by  
robust solid NHC-Rh coordination assemblies in water**

Jie Chen,<sup>a</sup> Jiale Ji<sup>a</sup> and Tao Tu <sup>\*a,b</sup>

<sup>a</sup> *Shanghai Key Laboratory of Molecular Catalysis and Innovative Materials,  
Department of Chemistry, Fudan University, 2005 Songhu Road, Shanghai 200438,  
China*

<sup>b</sup> *State Key Laboratory of Organometallic Chemistry, Shanghai Institute of Organic  
Chemistry, Chinese Academy of Sciences, Shanghai 200032, China*

\* Corresponding author.

*E-mail:* taotu@fudan.edu.cn.

## Table of Contents:

|                                                                         |    |
|-------------------------------------------------------------------------|----|
| 1. General.....                                                         | 3  |
| 2. General procedure for the synthesis of catalyst 6a-d.....            | 3  |
| 3. Catalytic hydrogenation of phenol and derivatives .....              | 4  |
| 4 FT-IR, solid-state $^{13}\text{C}$ NMR.....                           | 13 |
| 5. Leaching tests with ICP-AES .....                                    | 14 |
| 6. Derivation of cyclohexanol and derivatives.....                      | 15 |
| 7. $^1\text{H}$ , $^{13}\text{C}$ and $^{19}\text{F}$ NMR spectra. .... | 17 |
| 8. References.....                                                      | 47 |

## 1. General

All commercial reagents were used directly without further purification unless otherwise stated. Dry *N,N*-dimethylformamide (DMF) was purchased from Alfa Aesar, stored over 4 Å molecular sieves, and handled under N<sub>2</sub> atmosphere. Hydrogen gas (99.99%) was purchased from Dumaoui. All reaction vials were purchased from Beijing Synthware Glass. CDCl<sub>3</sub> and D<sub>2</sub>O were purchased from Cambridge Isotope Laboratories. <sup>1</sup>H, <sup>13</sup>C and <sup>19</sup>F NMR spectra were recorded on Jeol ECA-400 and Bruker 400 DRX spectrometers. The chemical shifts (δ) for <sup>1</sup>H NMR are given in parts per million (ppm) referenced to the residual proton signal of the deuterated solvent (CHCl<sub>3</sub> at δ 7.26 ppm, D<sub>2</sub>O at δ 4.79 ppm); coupling constants are expressed in hertz (Hz). <sup>13</sup>C NMR spectra were referenced to the carbon signal of CDCl<sub>3</sub> (77.0 ppm). The following abbreviations are used to describe NMR signals: *s* = singlet, *d* = doublet, *t* = triplet, *m* = multiplet. Scanning electron microscope (SEM) experiments were carried out on a Philips XL30 microscope operated at 20 kV. Transmission electron microscope (TEM) experiments were carried out on a JEOL JEM 2010 transmission electron microscope. XPS experiments were carried out on PHI 5000C&PHI5300.

## 2. General procedure for the synthesis of catalyst 6a-d

The self-supported catalysts **6a-d** were synthesized according to the literature reports.<sup>1</sup>

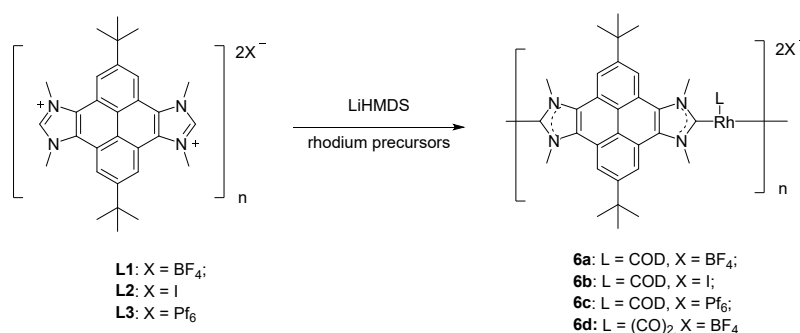

**Scheme S1.** Syntheses of NHC-Rh solid coordination assemblies **6a-d**.

The NHC-Rh solid coordination assemblies **6a-d** were synthesized according to our previous synthetic procedures.<sup>1</sup> The corresponding bis-imidazolium salts (0.2

mmol) and rhodium precursors ( $[\text{Rh}(\text{COD})\text{Cl}]_2$  or  $\text{Rh}(\text{acac})(\text{CO})_2$ , 0.2 mmol) were dissolved in DMF under nitrogen. And then, LiHMDS was added at room temperature. The mixture reacted at 80 °C for 24 hours. The solid product was obtained by centrifugation and then washed three times with DMF, water, and methanol, respectively.

### 3. Catalytic hydrogenation of phenol and derivatives

#### 3.1 Reaction condition optimization

**Table S1.** Optimization for hydrogenation of phenol<sup>a</sup>

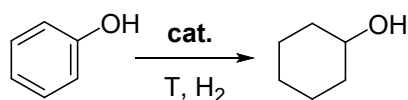

| Entry           | Cat.<br>(0.5 mol %) | Base<br>(5 mol %) | Solvent<br>(4 mL)  | H <sub>2</sub><br>(bar) | Temp.<br>(°C) | Yield<br>(%) |
|-----------------|---------------------|-------------------|--------------------|-------------------------|---------------|--------------|
| 1               | <b>5</b>            | KOH               | THF                | 20                      | 80            | NR           |
| 2               | <b>5</b>            | KOH               | <i>i</i> -PrOH     | 20                      | 80            | NR           |
| 3               | <b>5</b>            | KOH               | EtOH               | 20                      | 80            | NR           |
| 4               | <b>5</b>            | KOH               | CH <sub>3</sub> CN | 20                      | 80            | NR           |
| 5               | <b>5</b>            | KOH               | 1,4-dioxane        | 20                      | 80            | NR           |
| 6               | <b>5</b>            | KOH               | H <sub>2</sub> O   | 20                      | 80            | 65%          |
| 7               | <b>6a</b>           | KOH               | H <sub>2</sub> O   | 20                      | 80            | 85%          |
| 8 <sup>b</sup>  | <b>6a</b>           | KOH               | H <sub>2</sub> O   | 20                      | 80            | 68%          |
| 9               | <b>6a</b>           | <i>t</i> -BuONa   | H <sub>2</sub> O   | 20                      | 80            | 93%          |
| 10              | <b>6a</b>           | <i>t</i> -BuONa   | H <sub>2</sub> O   | 20                      | 30            | 92%          |
| 11              | <b>6a</b>           | <i>t</i> -BuONa   | H <sub>2</sub> O   | 5                       | 30            | 94%          |
| 12 <sup>c</sup> | <b>6a</b>           | <i>t</i> -BuONa   | H <sub>2</sub> O   | 5                       | 30            | 90%          |

<sup>a</sup>Reaction conditions: phenol 1.0 mmol, cat 0.5 mol%, base 0.05 mmol, solvent 4 mL for 24 h. Yield was determined based on <sup>1</sup>H NMR results by using 1,3,5-trimethoxybenzene as an internal standard.

<sup>b</sup>Base 0.1 mmol. <sup>c</sup>Phenol 20 mmol.

#### 3.2 General procedure for the hydrogenation of phenol

The hydrogenation of phenol was carried out in a stainless-steel autoclave (125 mL). In a typical experiment, phenol derivatives (1.0 mmol), **6a** (0.5 mol%) and *t*-BuONa (0.05 mmol) were added to a stainless-steel autoclave with a magnetic stirring bar, and then 4mL deionized water was added. The autoclave was purged thrice with H<sub>2</sub> (10 bar), pressurized to 5-20 bar H<sub>2</sub>, and then heated to 30-80 °C. The reactions were stirred for the required time. After the reaction was completed, the autoclave was cooled in an ice water bath for a period of time to room temperature. The remaining hydrogen was discharged. Extracted with dichloromethane several times and collected the organic phase. Then 1,3,5-trimethoxybenzene was added to the organic phase as an internal standard for <sup>1</sup>H NMR analysis to determine the yield. And the corresponding products were further purified by column chromatography.

### 3.3 General procedure for the reuse of catalyst

In a reused experiment, **6a** (0.37 mol%), *t*-BuONa (0.2 mmol) and phenol (4 mmol) were added to a stainless steel autoclave with a magnetic stirring bar, and then 13mL deionized water was added. The autoclave was purged thrice with H<sub>2</sub> (10 bar), pressurized to 5 bar H<sub>2</sub>, and then heated to 30 °C. The reactions were stirred for 24h. After the reaction was complete, the autoclave was cooled in an ice water bath for a period of time to room temperature. The remaining hydrogen was discharged. The reaction solution was centrifuged at 10000 rpm for 10 minutes. The upper liquid was poured out carefully. Then extracted with dichloromethane for several times and collected the organic phase. Then 1,3,5-trimethoxybenzene was added to the organic phase as an internal standard for <sup>1</sup>H NMR analysis to determine the yield. The precipitates obtained were washed with water, methanol and DCM for three times respectively. Then it was dried at 65 °C, and then used for the next hydrogenation reaction.

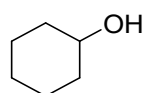

Cyclohexanol (**2**)<sup>2</sup>: colorless oil, yield: 94%

$^1\text{H}$  NMR (400 MHz,  $\text{CDCl}_3$ )  $\delta$  = 3.63 - 3.57 (m, 1H), 1.95 - 1.81 (m, 2H), 1.79 - 1.65 (m, 3H), 1.59 - 1.47 (m, 1H), 1.29 - 1.22 (m, 4H) ppm.  $^{13}\text{C}$  NMR (101 MHz,  $\text{CDCl}_3$ )  $\delta$  = 70.3, 35.5, 25.4, 24.1 ppm.

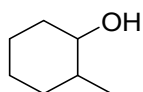

2-Methylcyclohexan-1-ol (**10a**)<sup>2</sup>: colorless oil, yield: 94%

$^1\text{H}$  NMR (400 MHz,  $\text{CDCl}_3$ )  $\delta$  = 3.87 - 3.00 (m, 1H), 1.78 - 1.64 (m, 2H), 1.63 - 1.46 (m, 2H), 1.45 - 1.33 (m, 2H), 1.28 - 1.05 (m, 3H), 1.00-0.91 (m, 3H) ppm.  $^{13}\text{C}$  NMR (101 MHz,  $\text{CDCl}_3$ )  $\delta$  = 76.4, 71.1, 40.2, 35.8, 35.4, 33.6, 32.4, 28.7, 25.6, 25.2, 24.4, 20.6, 18.5, 16.9 ppm.

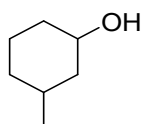

3-Methylcyclohexan-1-ol (**10b**)<sup>2</sup>: colorless oil, yield: 93%

$^1\text{H}$  NMR (400 MHz,  $\text{CDCl}_3$ )  $\delta$  = 4.06 - 3.54 (m, 1H), 1.97 - 1.93 (m, 1H), 1.81 - 1.68 (m, 1H), 1.62 - 1.58 (m, 2H), 1.46 - 1.20 (m, 3H), 1.18 - 1.03 (m, 1H), 0.93 - 0.89 (m, 3H), 0.88 - 0.70 (m, 1H) ppm.  $^{13}\text{C}$  NMR (101 MHz,  $\text{CDCl}_3$ )  $\delta$  = 70.9, 44.7, 35.5, 34.1, 31.5, 24.2, 22.4 ppm.

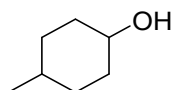

4-Methylcyclohexan-1-ol (**10c**)<sup>2</sup>: colorless oil, yield: 91%

$^1\text{H}$  NMR (400 MHz,  $\text{CDCl}_3$ )  $\delta$  = 3.93 - 3.43 (m, 1H), 2.06 - 1.85 (m, 1H), 1.80 - 1.63 (m, 2H), 1.63 - 1.50 (m, 1H), 1.52 - 1.43 (m, 1H), 1.40 - 1.16 (m, 3H), 1.07 - 0.92 (m, 1H), 0.90 - 0.86 (m, 3H) ppm.  $^{13}\text{C}$  NMR (101 MHz,  $\text{CDCl}_3$ )  $\delta$  = 70.9, 66.9, 35.6, 33.3, 32.2, 31.7, 31.1, 29.0, 21.9, 21.6 ppm.

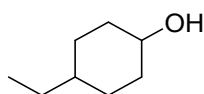

4-Ethylcyclohexane-1-ol (**10d**)<sup>3</sup>: colorless oil, yield: 85%

$^1\text{H}$  NMR (400 MHz,  $\text{CDCl}_3$ )  $\delta$  = 4.30 – 3.34 (m, 1H), 2.00 – 1.92 (m, 1H), 1.72 (m, 2H), 1.61 – 1.42 (m, 2H), 1.39 – 1.16 (m, 5H), 0.98 – 0.83 (m, 4H) ppm.  $^{13}\text{C}$  NMR (101 MHz,  $\text{CDCl}_3$ )  $\delta$  = 71.2, 67.3, 38.5, 38.0, 35.6, 32.3, 30.9, 29.3, 28.6, 26.6, 11.7, 11.6 ppm.

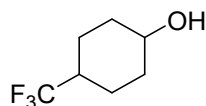

4-Trifluoromethylcyclohexane-1-ol (**10e**)<sup>4</sup>: colorless oil, yield: 91%

$^1\text{H}$  NMR (400 MHz,  $\text{CDCl}_3$ )  $\delta$  = 4.21 – 3.33 (m, 1H), 2.10 – 2.03 (m, 1H), 2.01 – 1.93 (m, 1H), 1.89 – 1.82 (m, 1H), 1.81 – 1.66 (m, 3H), 1.57 – 1.47 (m, 1H), 1.43 – 1.24 (m, 2H) ppm.  $^{13}\text{C}$  NMR (101 MHz,  $\text{CDCl}_3$ )  $\delta$  = 128.97, 69.72, 64.88, 41.65 – 40.76 (m), 33.80, 31.18, 23.36 (q,  $J$  = 2.5 Hz), 18.79 (q,  $J$  = 2.7 Hz). ppm.  $^{19}\text{F}$  NMR (376 MHz,  $\text{CDCl}_3$ )  $\delta$  = -73.54 (dd,  $J$  = 94.3, 8.5 Hz) ppm.

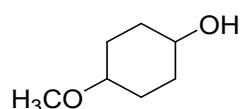

4-Methoxycyclohexane-1-ol: colorless oil (**10f**)<sup>5</sup>, yield: 92%

$^1\text{H}$  NMR (400 MHz,  $\text{CDCl}_3$ )  $\delta$  = 3.79 – 3.63 (m, 1H), 3.34 – 3.31 (m, 3H), 3.29 – 3.12 (m, 1H), 2.06 – 1.94 (m, 2H), 1.88 – 1.78 (m, 2H), 1.68 – 1.61 (m, 2H), 1.58 – 1.49 (m, 1H), 1.35 – 1.27 (m, 1H) ppm.  $^{13}\text{C}$  NMR (101 MHz,  $\text{CDCl}_3$ )  $\delta$  = 69.6, 68.3, 55.9, 55.5, 32.5, 30.3, 28.9, 27.0 ppm.

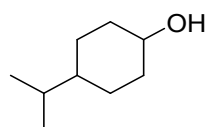

4-Isopropylcyclohexan-1-ol (**10g**)<sup>3</sup>: colorless oil, yield: 90%

$^1\text{H}$  NMR (400 MHz,  $\text{CDCl}_3$ )  $\delta$  = 4.09 – 3.44 (m, 1H), 2.04 – 1.95 (m, 1H), 1.84 – 1.69 (m, 2H), 1.60 – 1.38 (m, 5H), 1.30 – 1.17 (m, 1H), 1.13 – 1.02 (m, 1H), 0.95 – 0.80 (m, 6H) ppm.  $^{13}\text{C}$  NMR (101 MHz,  $\text{CDCl}_3$ )  $\delta$  = 71.2, 66.7, 43.3, 43.1, 35.8, 32.7, 32.4, 32.0, 27.8, 23.6, 19.9, 19.8 ppm.

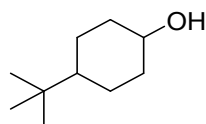

4-(Tert-butyl)cyclohexan-1-ol (**10h**)<sup>2</sup>: white solid, yield: 79%

<sup>1</sup>H NMR (400 MHz, CDCl<sub>3</sub>)  $\delta$  = 4.20 – 3.41 (m, 1H), 2.07 – 1.99 (m, 1H), 1.89 – 1.76 (m, 1H), 1.61 – 1.46 (m, 2H), 1.42 – 1.17 (m, 3H), 1.09 – 1.02 (m, 2H), 0.88 (d,  $J$  = 5.3 Hz, 9H) ppm. <sup>13</sup>C NMR (101 MHz, CDCl<sub>3</sub>)  $\delta$  = 71.2, 47.2, 36.1, 33.4, 27.6, 27.5, 25.6, 20.9 ppm.

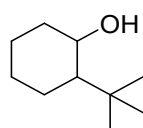

2-(Tert-butyl)cyclohexan-1-ol (**10i**)<sup>2</sup>: colorless oil, yield: 86%

<sup>1</sup>H NMR (400 MHz, CDCl<sub>3</sub>)  $\delta$  = 4.29 – 3.41 (m, 1H), 2.36 – 2.05 (m, 2H), 1.98 – 1.76 (m, 2H), 1.68 – 1.38 (m, 5H), 1.02 – 0.92 (m, 12H) ppm. <sup>13</sup>C NMR (101 MHz, CDCl<sub>3</sub>)  $\delta$  = 73.5, 67.9, 60.2, 53.7, 51.0, 44.2, 37.9, 35.2, 32.6, 31.9, 29.8, 29.3, 28.6, 27.7, 26.9, 26.0, 25.2, 21.3, 20.0 ppm.

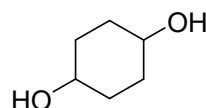

1,4-Dihydroxycyclohexane (**10j**)<sup>6</sup>: colorless oil, yield: 91%

<sup>1</sup>H NMR (400 MHz, D<sub>2</sub>O)  $\delta$  = 3.89 – 3.47 (m, 2H), 1.87 – 1.85 (m, 2H), 1.68 – 1.47 (m, 4H), 1.29 – 1.24 (m, 2H) ppm. <sup>13</sup>C NMR (101 MHz, D<sub>2</sub>O)  $\delta$  = 69.3, 67.3, 31.8, 29.1 ppm.

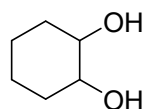

1,2-Dihydroxycyclohexane (**10k**)<sup>5</sup>: colorless oil, yield: 88%

<sup>1</sup>H NMR (400 MHz, D<sub>2</sub>O)  $\delta$  = 3.76 – 3.19 (m, 2H), 1.63 – 1.55 (m, 2H), 1.53 – 1.42 (m, 3H), 1.38 – 1.01 (m, 3H). <sup>13</sup>C NMR (101 MHz, D<sub>2</sub>O)  $\delta$  = 74.9, 70.5, 32.5, 29.0, 23.6, 21.0 ppm.



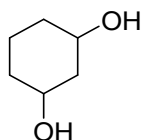

1,3-Dihydroxycyclohexane (**10l**)<sup>6</sup>: colorless oil, yield: 90%

<sup>1</sup>H NMR (400 MHz, D<sub>2</sub>O)  $\delta$  = 4.34 – 3.38 (m, 2H), 2.25 – 2.05 (m, 1H), 1.86 – 1.45 (m, 5H), 1.31 – 1.03 (m, 2H) ppm. <sup>13</sup>C NMR (101 MHz, D<sub>2</sub>O)  $\delta$  = 68.5, 66.8, 42.9, 40.1, 33.3, 32.3, 20.1, 18.4 ppm.

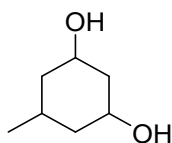

5-Methyl-1,3-dihydroxycyclohexane (**10m**)<sup>7</sup>: colorless oil, yield: 73%

<sup>1</sup>H NMR (400 MHz, D<sub>2</sub>O)  $\delta$  = 4.18 – 3.43 (m, 2H), 2.20 – 0.93 (m, 6H), 0.90 – 0.51 (m, 4H) ppm. <sup>13</sup>C NMR (101 MHz, D<sub>2</sub>O)  $\delta$  = 67.8, 67.4, 65.9, 42.6, 42.3, 41.9, 39.5, 39.1, 27.0, 24.9, 21.2, 20.9 ppm.

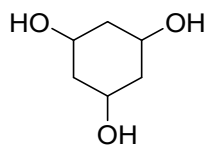

1,3,5-Trihydroxycyclohexane (**10n**)<sup>8</sup>: colorless oil, yield: 72%

<sup>1</sup>H NMR (400 MHz, D<sub>2</sub>O)  $\delta$  = 4.28 – 3.36 (m, 3H), 2.22 – 2.00 (m, 2H), 1.95 – 1.27 (m, 2H), 1.24 – 0.93 (m, 2H) ppm. <sup>13</sup>C NMR (101 MHz, D<sub>2</sub>O)  $\delta$  = 64.9, 41.9 ppm.

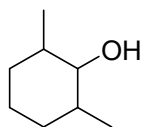

2,6-Dimethylcyclohexan-1-ol (**10o**)<sup>2</sup>: colorless oil, yield: 91%

<sup>1</sup>H NMR (400 MHz, CDCl<sub>3</sub>)  $\delta$  = 3.52 – 3.32 (m, 1H), 1.75 – 1.58 (m, 2H), 1.58 – 1.42 (m, 2H), 1.34 – 1.21 (m, 4H), 0.98 (dd, *J* = 17.8, 6.8 Hz, 6H) ppm. <sup>13</sup>C NMR (101 MHz, CDCl<sub>3</sub>)  $\delta$  = 75.1, 39.8, 37.2, 34.3, 27.4, 25.9, 19.9, 18.7 ppm.

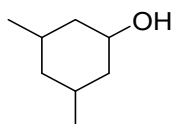

3,5-Dimethylcyclohexan-1-ol (**10p**)<sup>2</sup>: colorless oil, yield: 93%

<sup>1</sup>H NMR (400 MHz, CDCl<sub>3</sub>)  $\delta$  = 4.07 – 3.51 (m, 1H), 1.95 – 1.85 (m, 2H), 1.82 – 1.47 (m, 3H), 1.47 – 1.31 (m, 1H), 1.05 – 0.95 (m, 1H), 0.85 (dd,  $J$  = 19.3, 6.5 Hz, 6H), 0.81 – 0.69 (m, 1H) ppm. <sup>13</sup>C NMR (101 MHz, CDCl<sub>3</sub>)  $\delta$  = 70.4, 67.4, 44.1, 43.9, 43.1, 41.1, 30.7, 26.1, 22.5, 22.2 ppm.

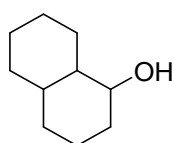

Decahydro-1-naphthalenol (**10q**)<sup>8</sup>: colorless oil, yield: 88%

<sup>1</sup>H NMR (400 MHz, CDCl<sub>3</sub>)  $\delta$  = 3.86 – 3.61 (m, 1H), 1.97 – 1.73 (m, 3H), 1.72 – 1.21 (m, 13H) ppm. <sup>13</sup>C NMR (101 MHz, CDCl<sub>3</sub>)  $\delta$  = 73.5, 42.9, 35.7, 31.8, 29.4, 26.3, 24.4, 24.3, 21.5, 18.9 ppm.

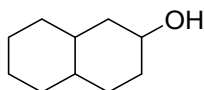

Decahydro-2-naphthalenol (**10r**)<sup>5</sup>: colorless oil, yield: 72%

<sup>1</sup>H NMR (400 MHz, DMSO-*d*<sub>6</sub>)  $\delta$  = 4.42 (d,  $J$  = 4.4 Hz, 1H), 3.44 – 3.33 (m, 1H), 1.72–1.65 (m, 3H), 1.54 – 1.34 (m, 10H), 1.29 – 1.15 (m, 3H) ppm. <sup>13</sup>C NMR (101 MHz, DMSO-*d*<sub>6</sub>)  $\delta$  = 70.1, 35.8, 35.1, 34.6, 31.9, 30.8, 30.1, 29.6, 26.7, 25.9, 21.2 ppm.

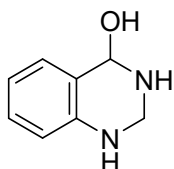

1-Hydroxy-2,3,4,5-tetrahydro-1H-benzo [E] [1,4] diazepine (**10s**): white solid, yield: 72%

<sup>1</sup>H NMR (400 MHz, CDCl<sub>3</sub>)  $\delta$  = 7.90 – 7.85 (m, 1H), 7.45 (s, 1H), 7.37 – 7.21 (m, 1H), 6.91 – 6.83 (m, 1H), 6.74 – 6.68 (m, 1H), 4.66 (t,  $J$  = 2.4 Hz, 2H), 4.47 (s, 1H) ppm.

$^{13}\text{C}$  NMR (101 MHz,  $\text{CDCl}_3$ )  $\delta$  = 165.9, 148.3, 133.7, 128.5, 119.5, 116.8, 115.1, 54.8 ppm.

HR-MS (ESI),  $m/z$ :  $[\text{M}+\text{H}]^+$  calculated for  $\text{C}_8\text{H}_{11}\text{N}_2\text{O}$ : 151.0871, found: 151.0859.

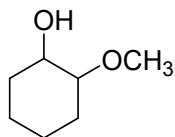

2-Methoxycyclohexanol (**10t**)<sup>9</sup>: colorless oil, yield: 99%

$^1\text{H}$  NMR (400 MHz,  $\text{CDCl}_3$ )  $\delta$  = 3.92 – 3.74 (m, 1H), 3.38 (s, 3H), 3.31 – 3.25 (m, 1H), 1.85 – 1.72 (m, 2H), 1.66 – 1.47 (m, 4H), 1.37 – 1.18 (m, 2H) ppm.  $^{13}\text{C}$  NMR (101 MHz,  $\text{CDCl}_3$ )  $\delta$  = 80.1, 68.4, 56.0, 30.4, 26.0, 22.0, 21.2 ppm.

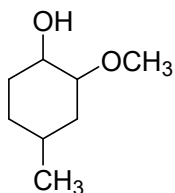

4-Methyl-2-methoxycyclohexanol (**10u**)<sup>9</sup>: colorless oil, yield: XX%

$^1\text{H}$  NMR (400 MHz,  $\text{CDCl}_3$ )  $\delta$  = 4.08 (m, 1H), 3.38 (s, 3H), 3.23-3.06 (m, 1H), 2.01-1.90 (m, 1H), 1.75-1.65 (m, 1H), 1.26 (dd,  $J$  = 20.5, 14.6 Hz, 4H), 0.94 (d,  $J$  = 5.9 Hz, 4H) ppm.  $^{13}\text{C}$  NMR (101 MHz,  $\text{CDCl}_3$ )  $\delta$  = 80.7, 65.4, 55.7, 33.8, 30.9, 29.76, 27.6, 22.1 ppm.

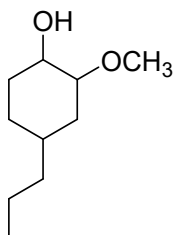

4-Propyl-2-methoxycyclohexanol (**10v**)<sup>9</sup>: colorless oil, yield: 65%

$^1\text{H}$  NMR (400 MHz,  $\text{CDCl}_3$ )  $\delta$  = 4.12-4.06 (m, 1H), 3.38 (s, 3H), 3.24-3.06 (m, 1H), 1.97 (d,  $J$  = 12.4 Hz, 1H), 1.72 (dd,  $J$  = 18.4, 13.6 Hz, 1H), 1.26 (t,  $J$  = 8.3 Hz, 7H), 0.88 (t,  $J$  = 7.1 Hz, 5H) ppm.  $^{13}\text{C}$  NMR (101 MHz,  $\text{CDCl}_3$ )  $\delta$  = 80.8, 65.7, 55.7, 39.1, 35.6, 31.9, 29.7, 25.6, 19.8, 14.2 ppm.

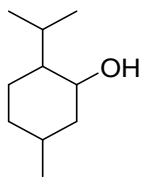

2-Isopropyl-5-methylcyclohexan-1-ol (**10w**)<sup>11</sup>: white solid, yield: 70%

<sup>1</sup>H NMR (400 MHz, CDCl<sub>3</sub>)  $\delta$  = 4.34 – 3.70 (m, 1H), 1.80 – 1.53 (m, 5H), 1.51 – 1.29 (m, 3H), 1.17 – 0.98 (m, 6H), 0.98 – 0.90 (m, 3H), 0.90 – 0.84 (m, 1H) ppm. <sup>13</sup>C NMR (101 MHz, CDCl<sub>3</sub>)  $\delta$  = 71.5, 50.1, 45.0, 34.5, 31.6, 25.8, 23.1, 22.2, 21.0, 16.1 ppm.

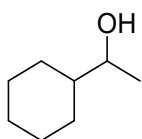

1-Cyclohexane-1-ethanol (**10x**)<sup>9</sup>: colorless oil, yield: 91%

<sup>1</sup>H NMR (400 MHz, CDCl<sub>3</sub>)  $\delta$  = 3.63 – 3.31 (m, 1H), 1.89 – 1.54 (m, 5H), 1.30 – 1.04 (m, 7H), 1.02 – 0.79 (m, 2H) ppm. <sup>13</sup>C NMR (101 MHz, CDCl<sub>3</sub>)  $\delta$  = 72.1, 45.1, 28.6, 28.4, 26.5, 26.2, 26.1, 20.3 ppm.

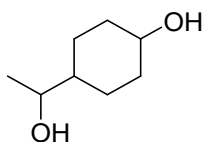

4-Hydroxy- $\alpha$ -methylcyclohexanemethanol (**10y**)<sup>10</sup>: colorless oil, yield: 87%

<sup>1</sup>H NMR (400 MHz, CDCl<sub>3</sub>)  $\delta$  = 4.06 – 3.39 (m, 2H), 2.10 – 1.62 (m, 3H), 1.60 – 1.37 (m, 3H), 1.30 – 1.15 (m, 2H), 1.12 (t,  $J$  = 6.7 Hz, 3H), 1.08 – 0.93 (m, 1H) ppm. <sup>13</sup>C NMR (101 MHz, CDCl<sub>3</sub>)  $\delta$  = 71.4, 71.1, 70.7, 66.1, 43.9, 43.9, 35.0, 34.9, 32.1, 32.0, 26.7, 26.4, 22.5, 21.6, 20.5, 20.4 ppm.

## 4 FT-IR, solid-state <sup>13</sup>C NMR

### 4.1 FT-IR spectra of coordination assemblies

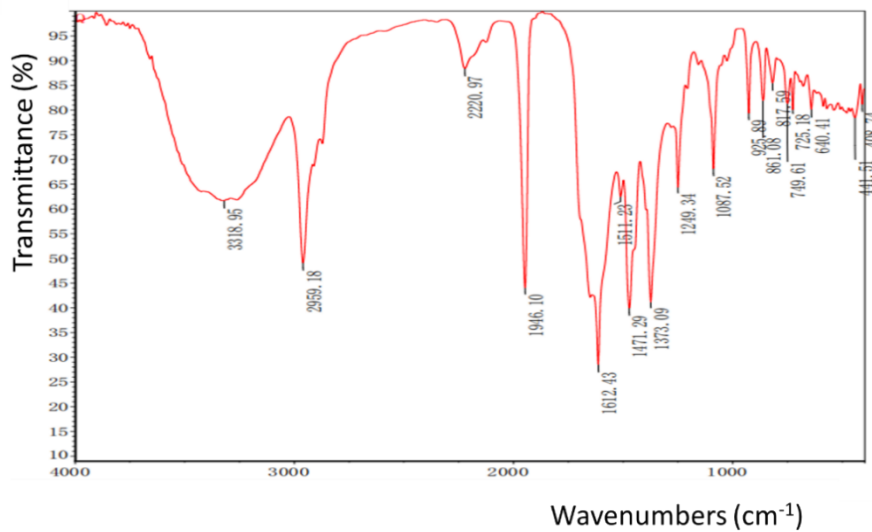

**Fig. S1** FT-IR spectrum of freshly prepared NHC-Rh solid catalyst **6a**.

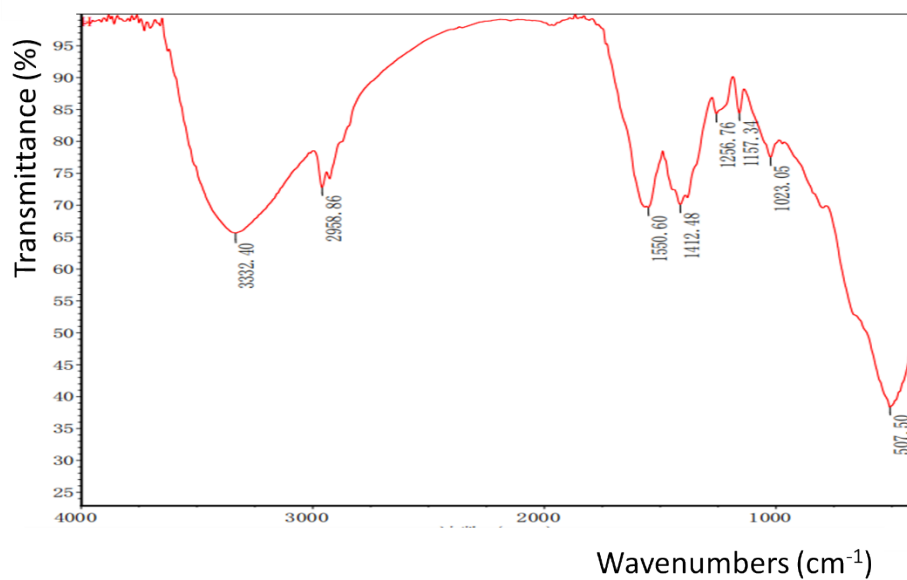

**Fig. S2** FT-IR spectrum of recovered NHC-Rh solid catalyst **6a**.

## 4.2 Solid-state $^{13}\text{C}$ NMR

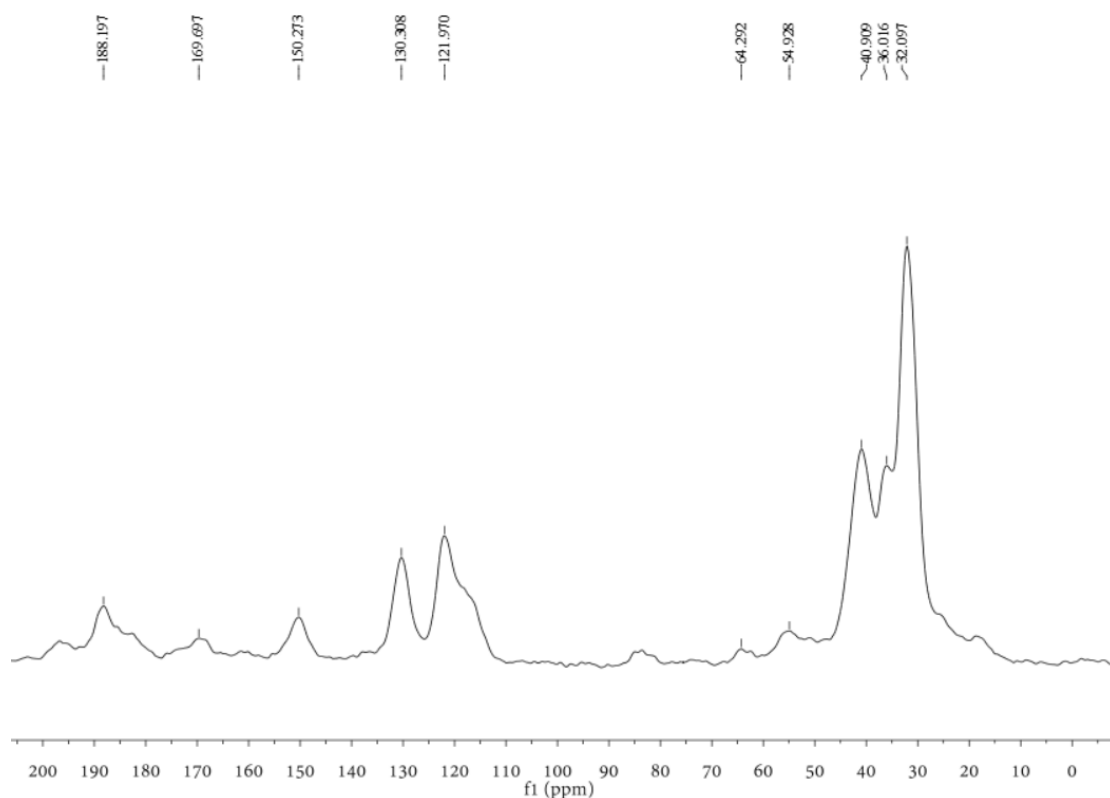

**Fig. S3** Solid-state  $^{13}\text{C}$  NMR of NHC-Rh solid catalyst **6a**.

## 5. Leaching tests with ICP-AES

**Table S2.** Rh and B leaching tests with the filtrates of the reaction mixture after consecutive runs<sup>a</sup>.

| Run | Elementary | Concentration(mg/L) <sup>a</sup> | Concentration(mg) |
|-----|------------|----------------------------------|-------------------|
| 1   | Rh         | 0.0125                           | <0.005            |
| 3   | Rh         | 0.0040                           | <0.005            |
| 5   | Rh         | 0.0063                           | <0.005            |
| 7   | Rh         | 0.0071                           | <0.005            |
| 9   | Rh         | 0.0385                           | <0.005            |
| 1   | B          | 0.0219                           | <0.005            |
| 3   | B          | 0.0625                           | <0.005            |
| 5   | B          | 0.0643                           | <0.005            |
| 7   | B          | 0.0392                           | <0.005            |
| 9   | B          | 0.0553                           | <0.005            |

<sup>a</sup>ICP-AES analysis of the reaction filtrates after each consecutive run (reaction was carried at 4 mmol scale with 0.37 mol % **6a**). After filtration, the recovered catalyst was washed with 10 mL dichloromethane then separated with centrifuging. After full

volatilization of the dichloromethane at r.t, the residue was diluted to 50 mL as an alkaline or higher concentration will both cause a flameout of ICP-AES. The corresponding amount of Rh in the original mixture is  $0.05 \times$  the concentration measured with ICP-AES (mg).

## 6. Derivation of cyclohexanol and derivatives

### 6.1 Preparation of adipic chloride

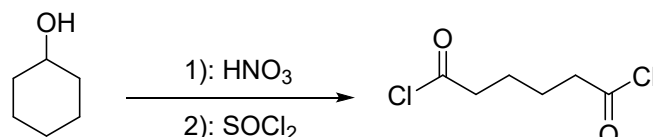

**Scheme S2.** Preparation of adipic chloride.

Cyclohexanol (0.5 mmol) was added into a round-bottom flask, and then  $\text{HNO}_3$  (1 mL) was slowly added in drops. After stirring at  $60\text{ }^\circ\text{C}$  for 30 min, the resulting reaction mixture was heated to  $100\text{ }^\circ\text{C}$  and stirred for 5 min. After filtration, white solids were obtained. The obtained solid reacted with  $\text{SOCl}_2$  under reflux at  $85\text{ }^\circ\text{C}$  for 15 h. The solvent was removed under vacuum, washed with n-hexane. Colorless oil was obtained (512 mg, 54%).<sup>12,13</sup>

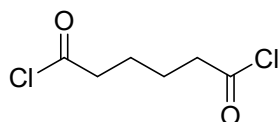

adipic chloride<sup>13</sup>: colorless oil

$^1\text{H}$  NMR (400 MHz,  $\text{CDCl}_3$ )  $\delta = 3.01 - 2.84$  (m, 4H),  $1.78 - 1.72$  (m, 4H) ppm.  $^{13}\text{C}$  NMR (101 MHz,  $\text{CDCl}_3$ )  $\delta = 173.3, 46.4, 23.7$  ppm.

### 6.2 Preparation of 1-chloroethylcyclohexyl carbonate

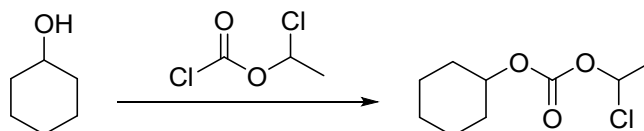

**Scheme S3.** Preparation of 1-chloroethylcyclohexyl carbonate.

To a solution of Cyclohexanol (5 mmol) and pyridine (5.5 mmol) in dichloromethane (4 mL) was added Chloroacetyl chloride (5.5 mmol) in dichloromethane (1 mL). After stirring at -78 °C for 30 min, the resulting reaction mixture was stirred at room temperature for 12 h. The solvent was washed with water and then purified via column chromatography (PE/EA = 10:1) to give 1-chloroethylcyclohexyl carbonate as colorless oily liquid (976 mg, 95%).<sup>14</sup>

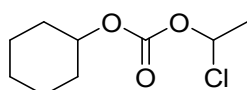

1-chloroethylcyclohexyl carbonate<sup>14</sup>: colorless oil

<sup>1</sup>H NMR (400 MHz, CDCl<sub>3</sub>)  $\delta$  = 6.59 – 6.22 (m, 1H), 4.75 – 4.56 (m, 1H), 1.96-1.85 (m, 2H), 1.81-1.76 (m, 3H), 1.75-1.67 (m, 2H), 1.56 – 1.41 (m, 3H), 1.38-1.19 (m, 3H) ppm. <sup>13</sup>C NMR (101 MHz, CDCl<sub>3</sub>)  $\delta$  = 152.2, 84.3, 77.9, 31.3, 31.3, 25.2, 25.1, 23.5 ppm.

### 6.3 Preparation of monomenthyl succinate

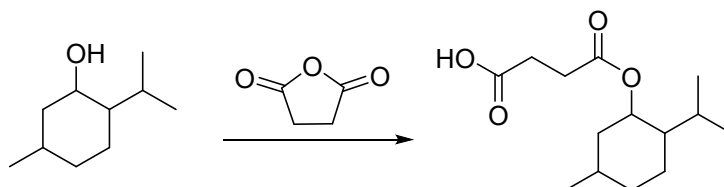

**Scheme S4.** Preparation of monomenthyl succinate.

A round-bottom flask was charged with menthol (5 mmol), succinic anhydride (10 mmol), DMAP (2.5 mmol) and chloroformand (20 mL), and stirred at 75 °C for 12 h. After reaction completion, solvent was removed under vacuum, and the residue was purified over column chromatography on silica gel to give monomenthyl succinate (998 mg, 78%) as a white solid.<sup>15</sup>

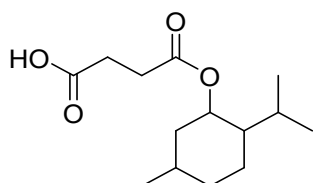



monomethyl succinate<sup>15</sup>: white solid

<sup>1</sup>H NMR (400 MHz, CDCl<sub>3</sub>) δ = 11.59 (s, 1H), 4.70 (m, 1H), 2.71-2.55 (m, 4H), 2.08-1.92 (m, 1H), 1.91 – 1.81 (m, 1H), 1.71-1.61 (m, 2H), 1.53 – 1.31 (m, 2H), 1.12 – 0.94 (m, 2H), 0.89 (t, *J* = 6.3 Hz, 6H), 0.87-0.79 (m, 1H), 0.74 (d, *J* = 6.9 Hz, 3H) ppm. <sup>13</sup>C NMR (101 MHz, CDCl<sub>3</sub>) δ = 178.6, 171.7, 74.8, 47.0, 40.8, 34.2, 31.4, 29.2, 29.1, 26.2, 23.4, 22.0, 20.7, 16.2 ppm.

## 7. <sup>1</sup>H, <sup>13</sup>C and <sup>19</sup>F NMR spectra.

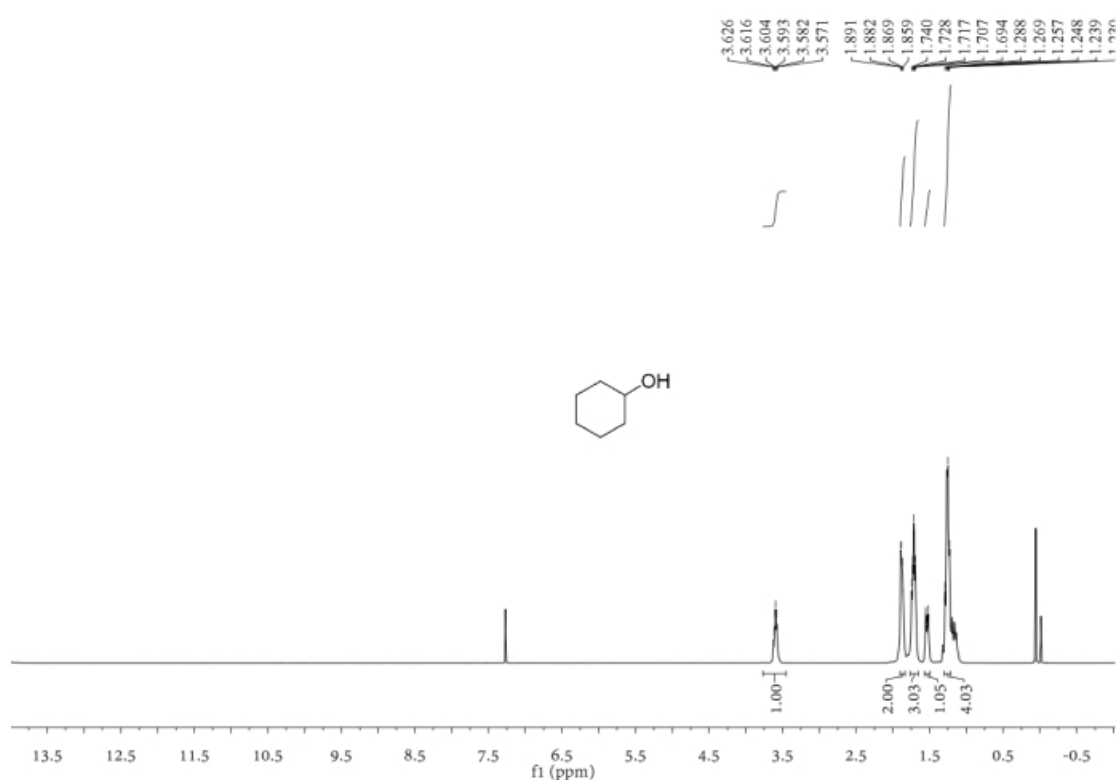

**Fig. S4** <sup>1</sup>H NMR (400 MHz, CDCl<sub>3</sub>, 298 K) spectrum of compound **2**.

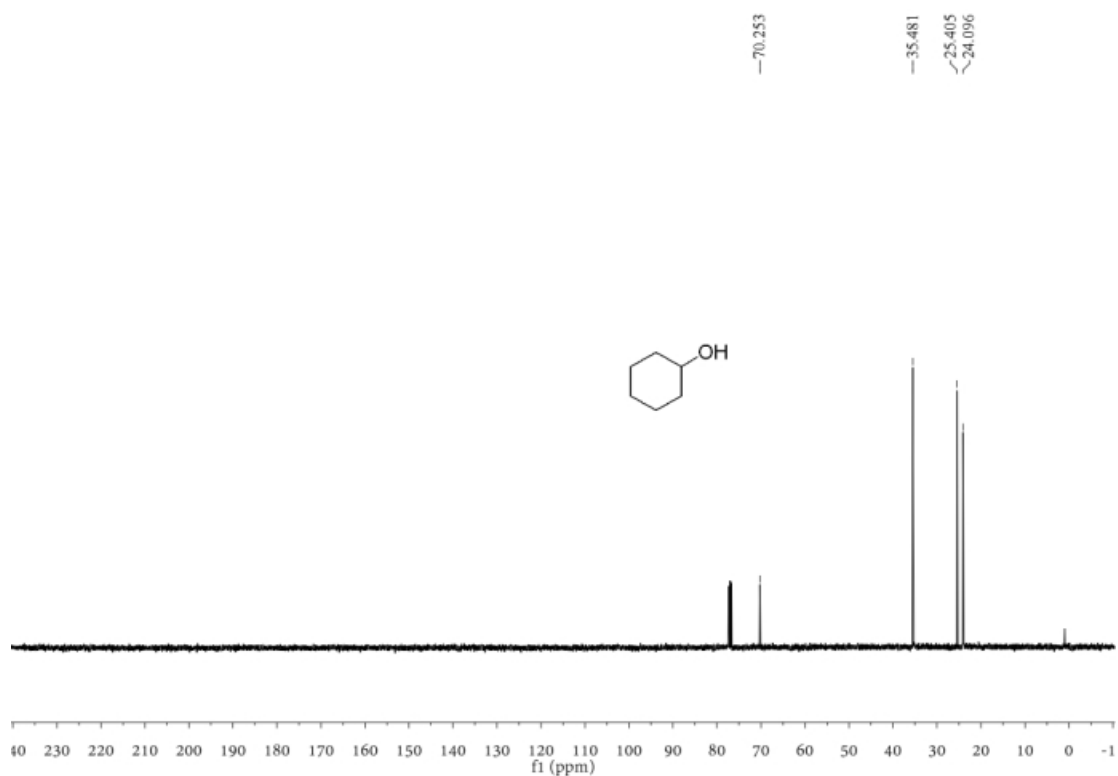

**Fig. S5**  $^{13}\text{C}$  NMR (101 MHz,  $\text{CDCl}_3$ , 298 K) spectrum of compound **2**.

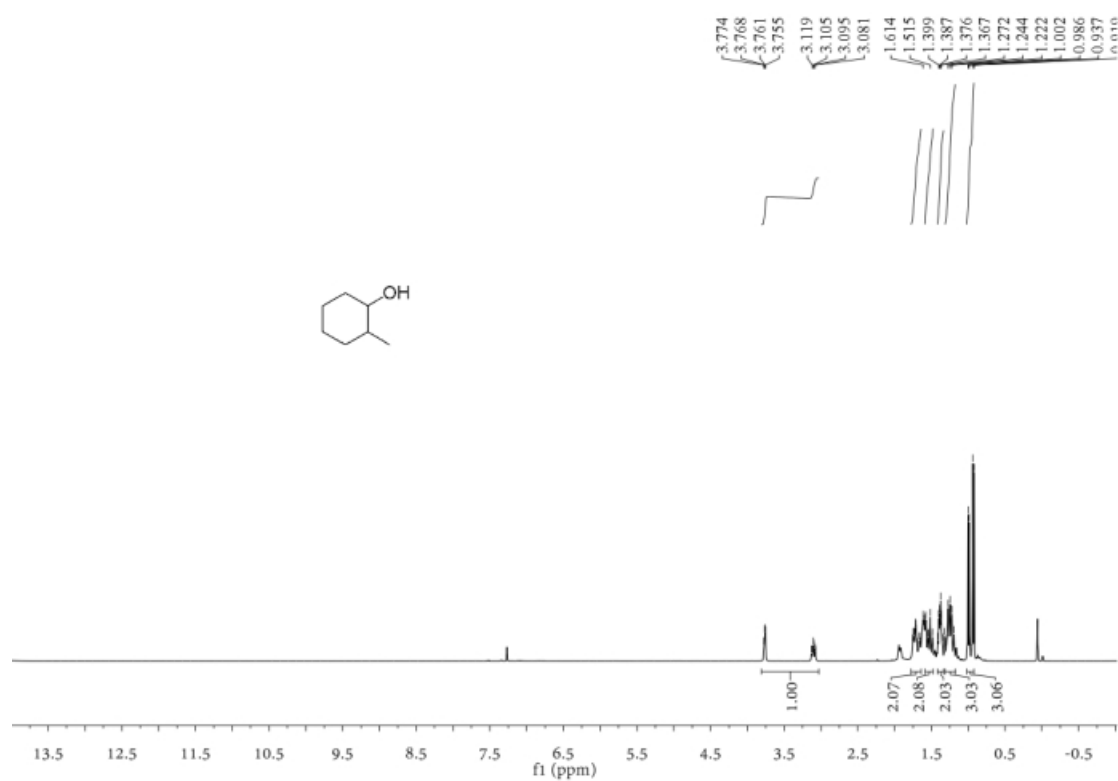

**Fig. S6**  $^1\text{H}$  NMR (400 MHz,  $\text{CDCl}_3$ , 298 K) spectrum of compound **10a**.

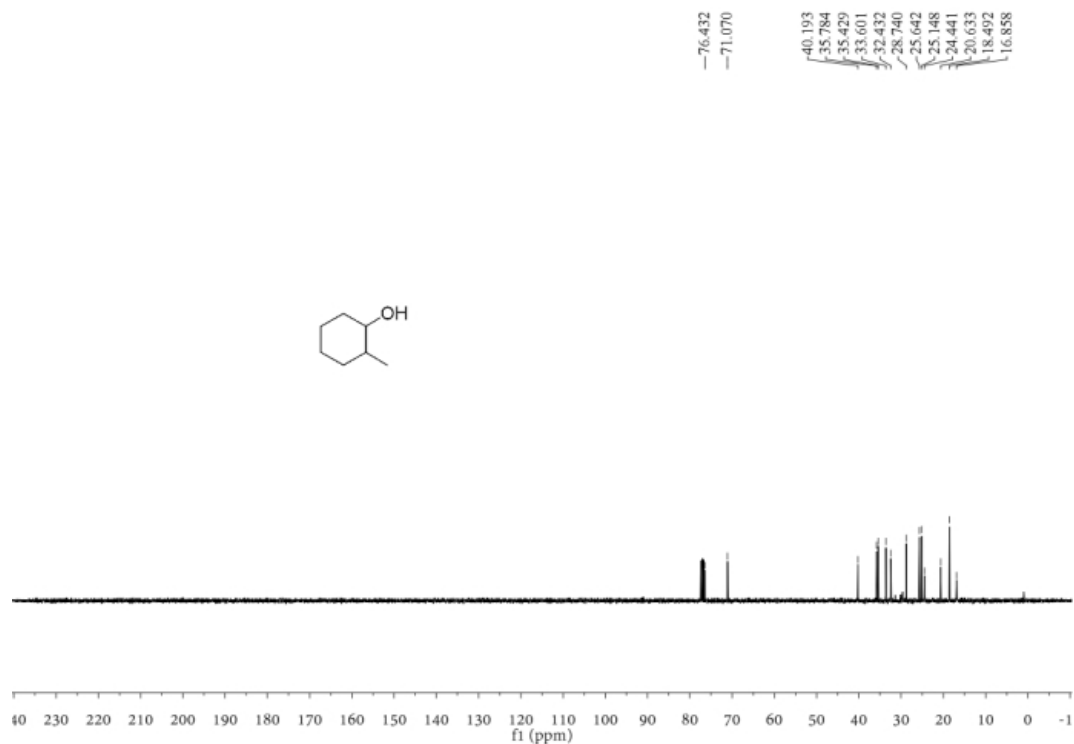

**Fig. S7**  $^{13}\text{C}$  NMR (101 MHz,  $\text{CDCl}_3$ , 298 K) spectrum of compound **10a**.

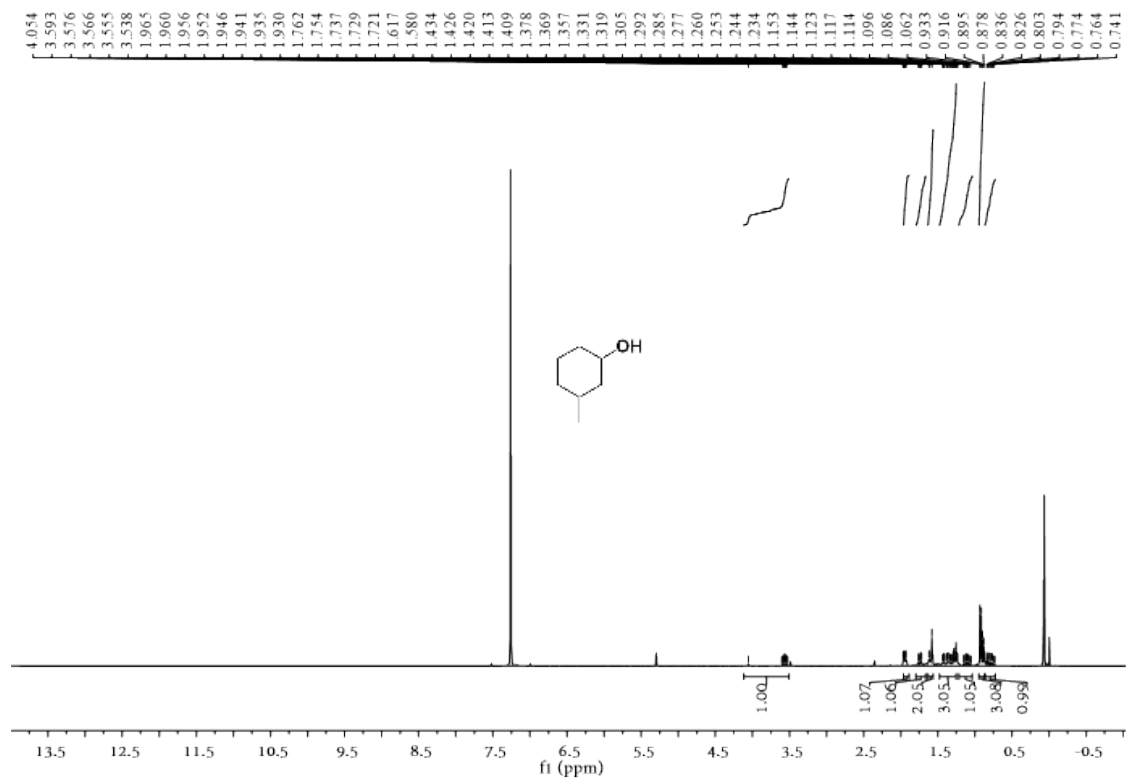

**Fig. S8**  $^1\text{H}$  NMR (400 MHz,  $\text{CDCl}_3$ , 298 K) spectrum of compound **10b**.

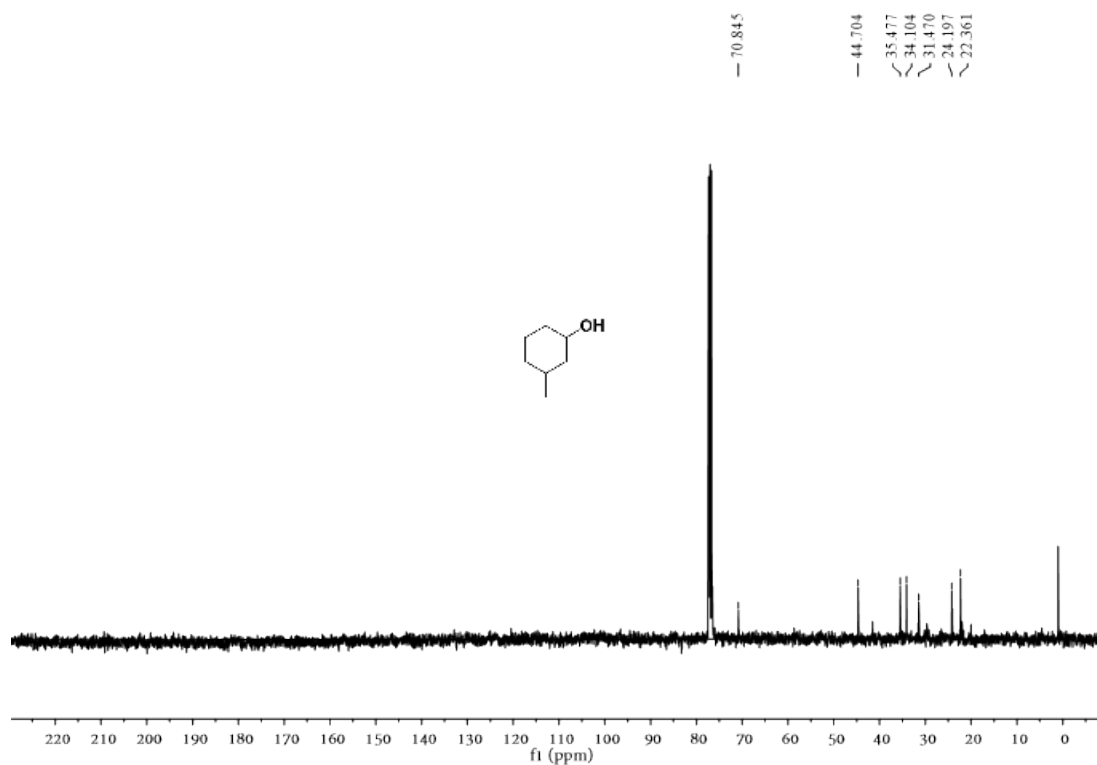

**Fig. S9**  $^{13}\text{C}$  NMR (101 MHz,  $\text{CDCl}_3$ , 298 K) spectrum of compound **10b**.

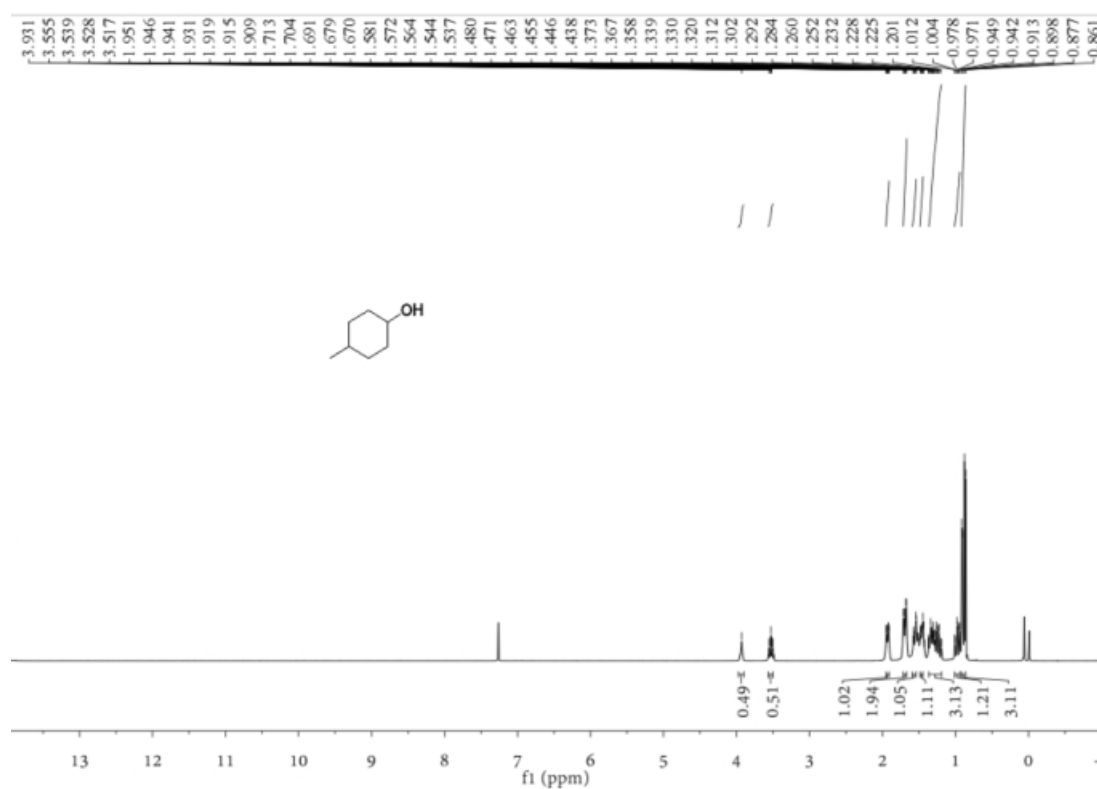

**Fig. S10**  $^1\text{H}$  NMR (400 MHz,  $\text{CDCl}_3$ , 298 K) spectrum of compound **10c**.

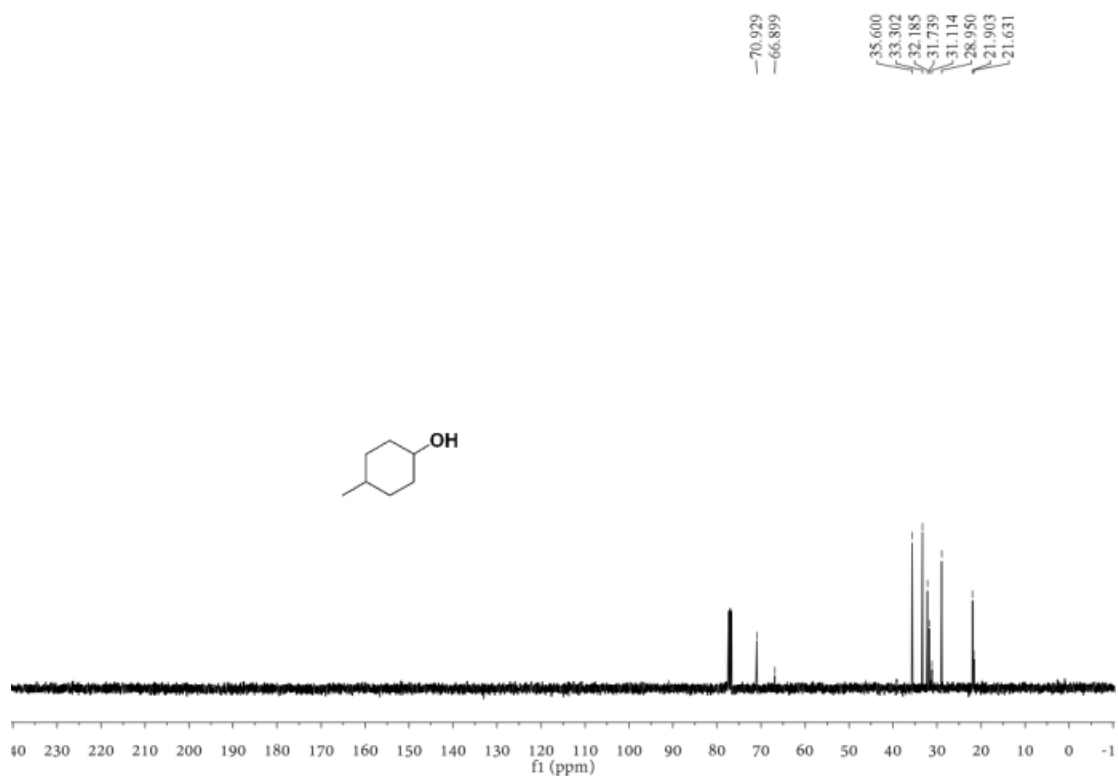

**Fig. S11**  $^{13}\text{C}$  NMR (101 MHz,  $\text{CDCl}_3$ , 298 K) spectrum of compound **10c**.

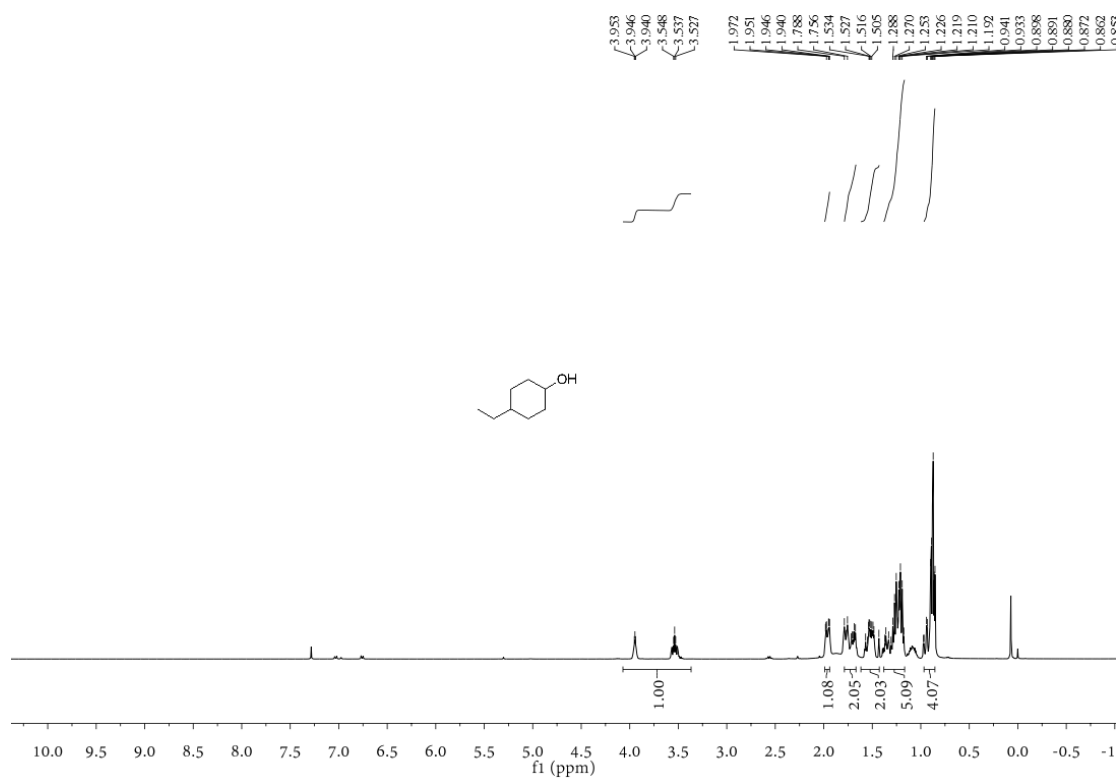

**Fig. S12**  $^1\text{H}$  NMR (400 MHz,  $\text{CDCl}_3$ , 298 K) spectrum of compound **10d**.

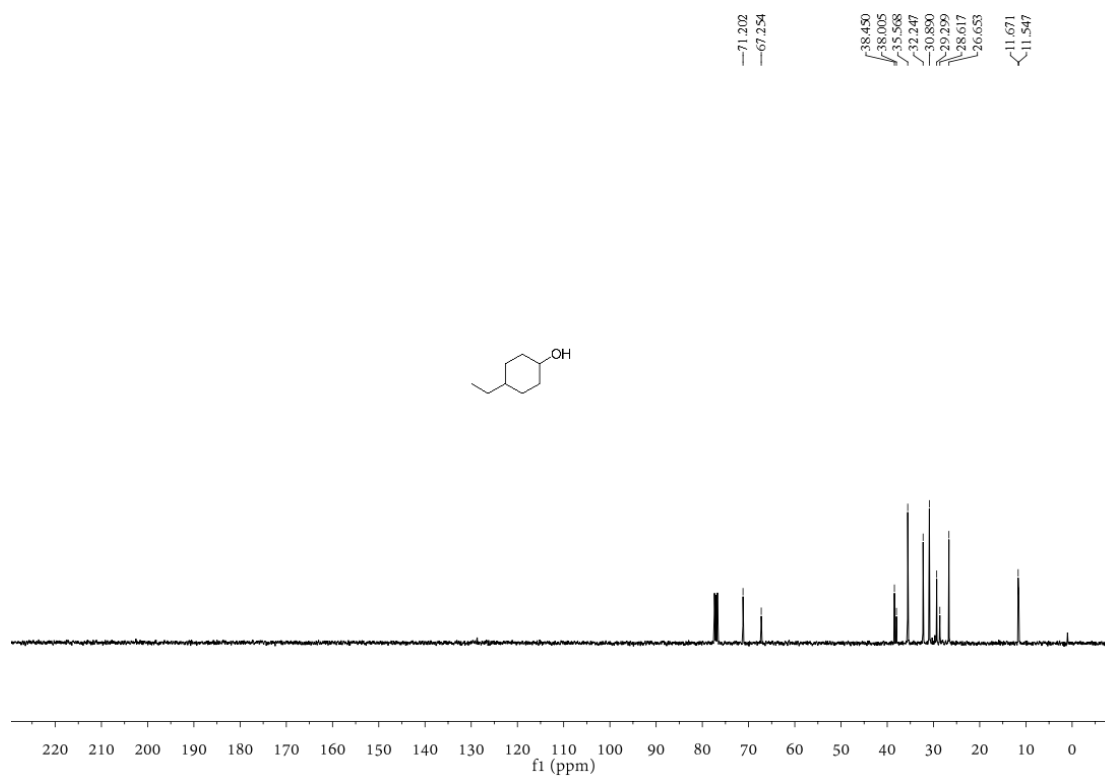

**Fig. S13**  $^{13}\text{C}$  NMR (101 MHz,  $\text{CDCl}_3$ , 298 K) spectrum of compound **10d**.

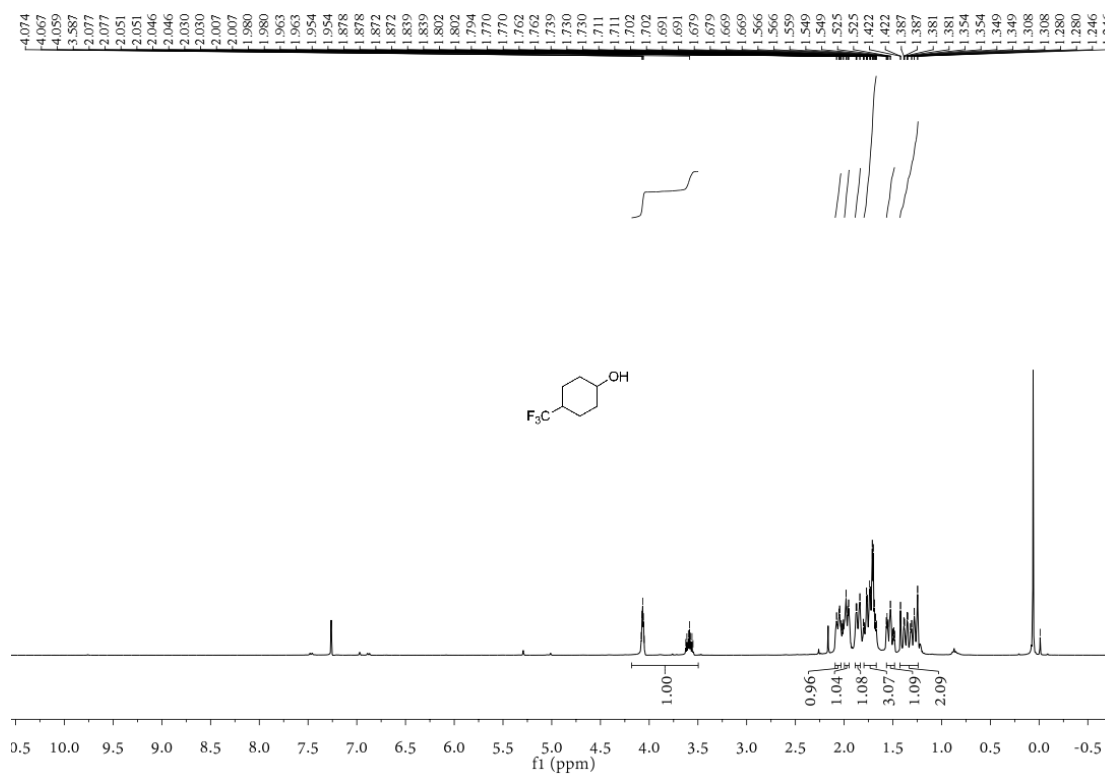

**Fig. S14**  $^1\text{H}$  NMR (400 MHz,  $\text{CDCl}_3$ , 298 K) spectrum of compound **10e**.

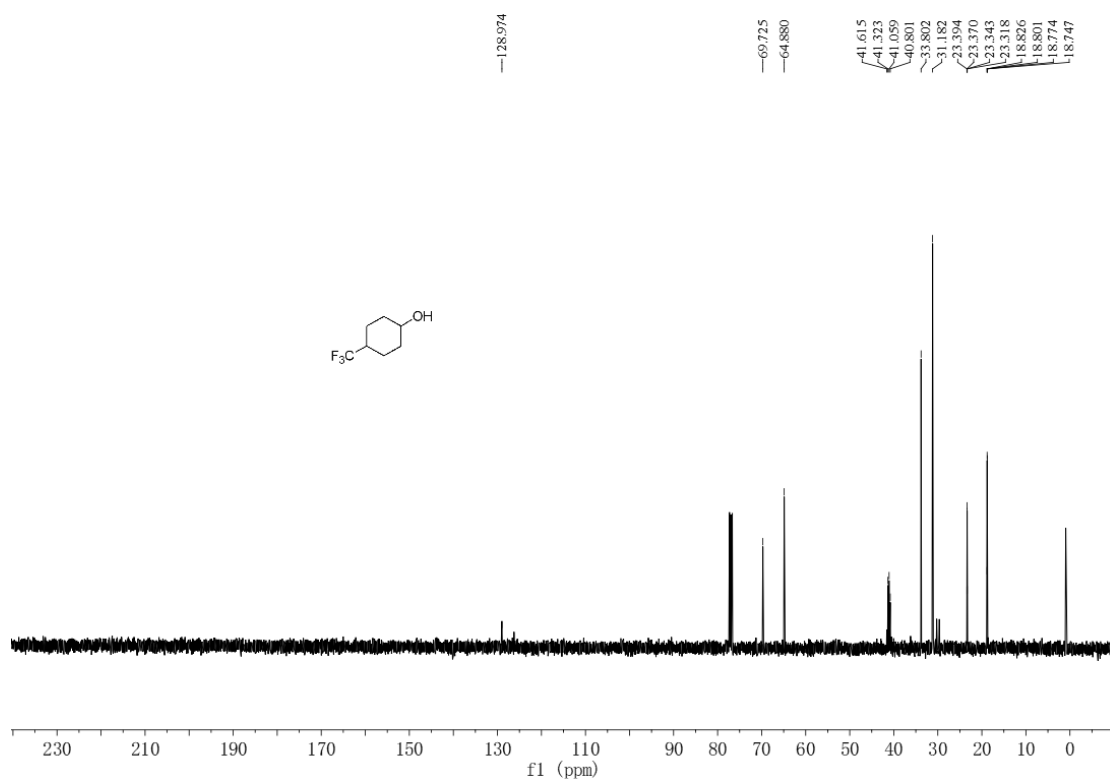

**Fig. S15**  $^{13}\text{C}$  NMR (101 MHz,  $\text{CDCl}_3$ , 298 K) spectrum of compound **10e**.

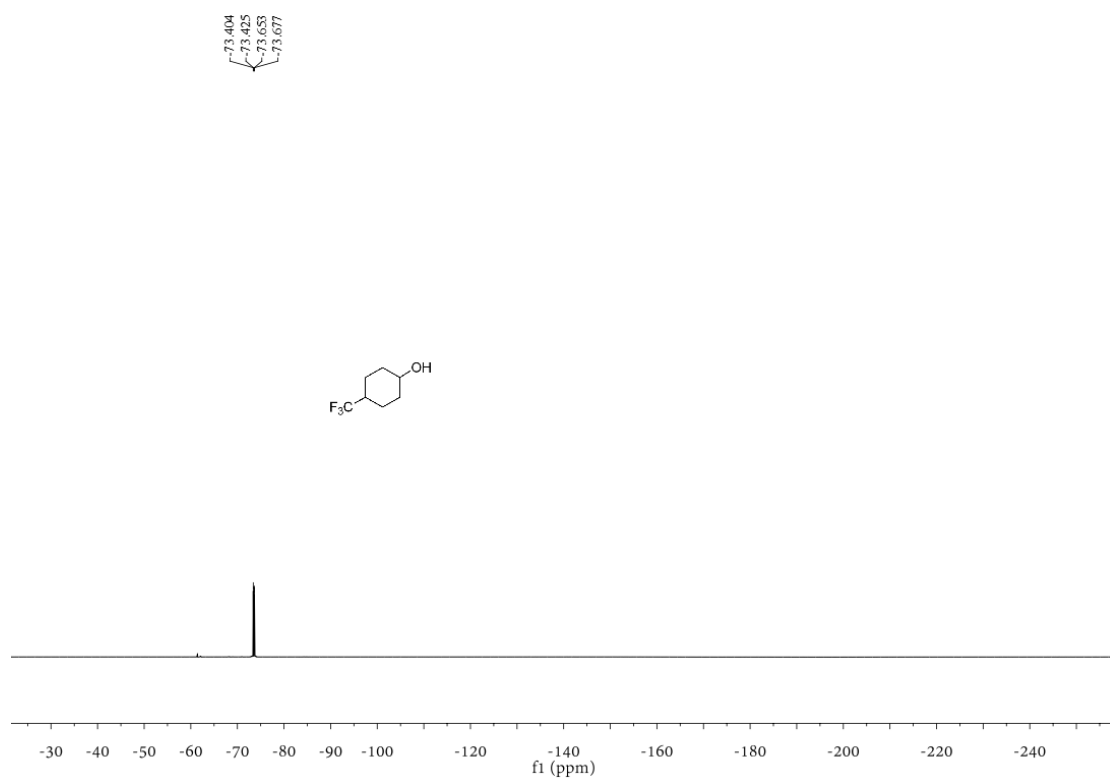

**Fig. S16**  $^{19}\text{F}$  NMR (376 MHz,  $\text{CDCl}_3$ , 298 K) spectrum of compound **10e**.

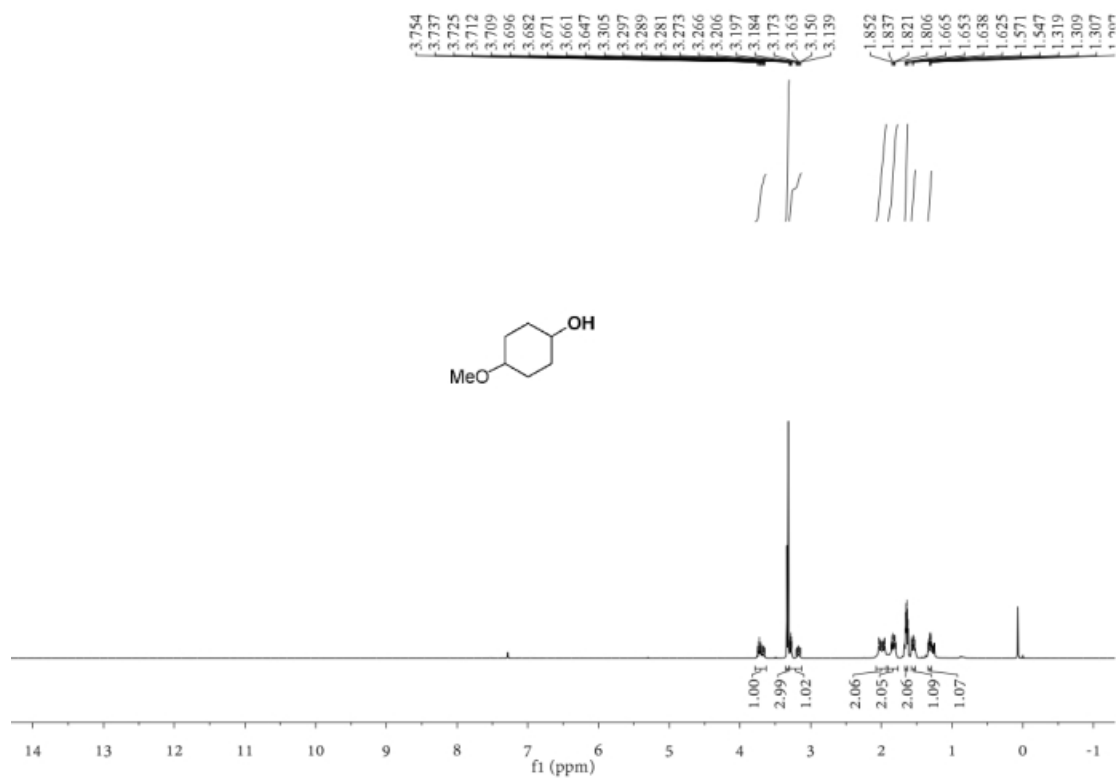

**Fig. S17** <sup>1</sup>H NMR (400 MHz, CDCl<sub>3</sub>, 298 K) spectrum of compound **10f**.

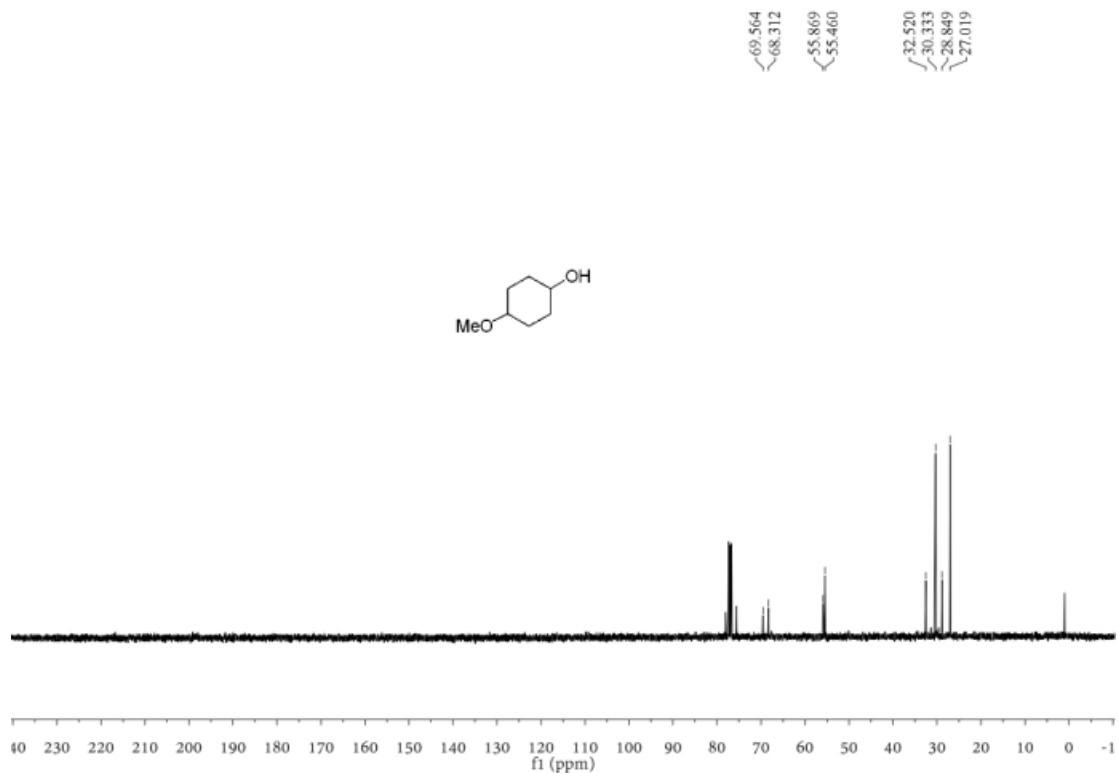

**Fig. S18** <sup>13</sup>C NMR (101 MHz, CDCl<sub>3</sub>, 298 K) spectrum of compound **10f**.



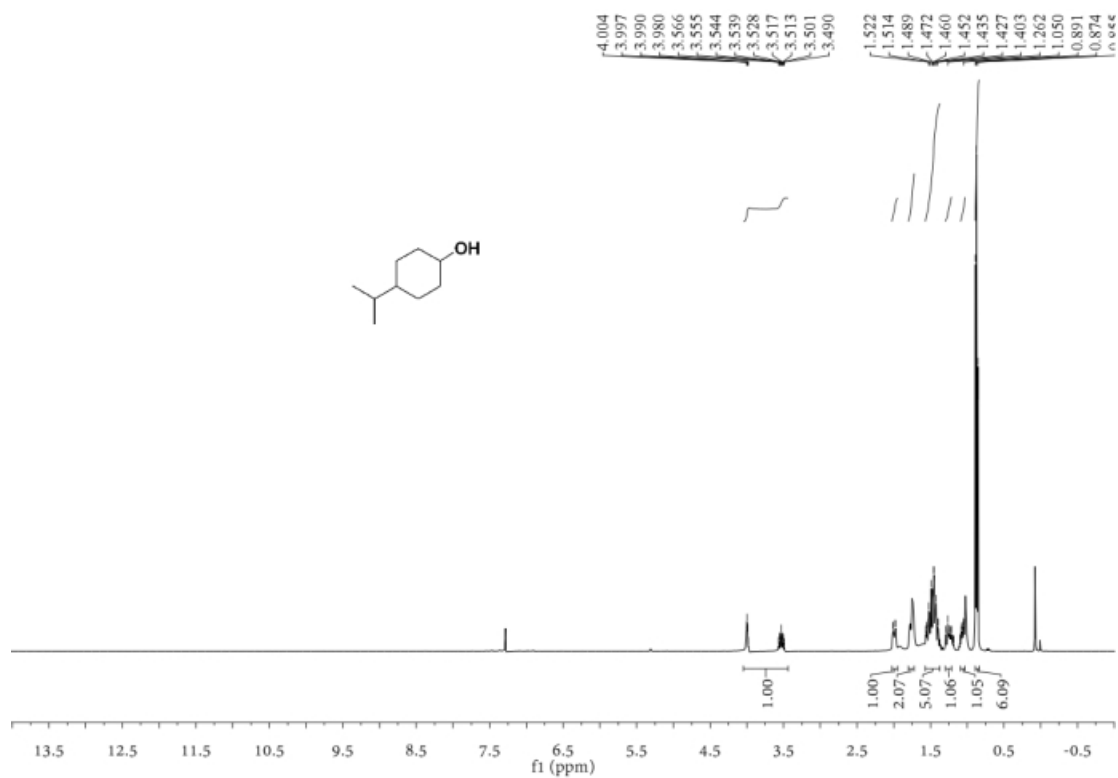

**Fig. S19** <sup>1</sup>H NMR (400 MHz, CDCl<sub>3</sub>, 298 K) spectrum of compound **10g**.

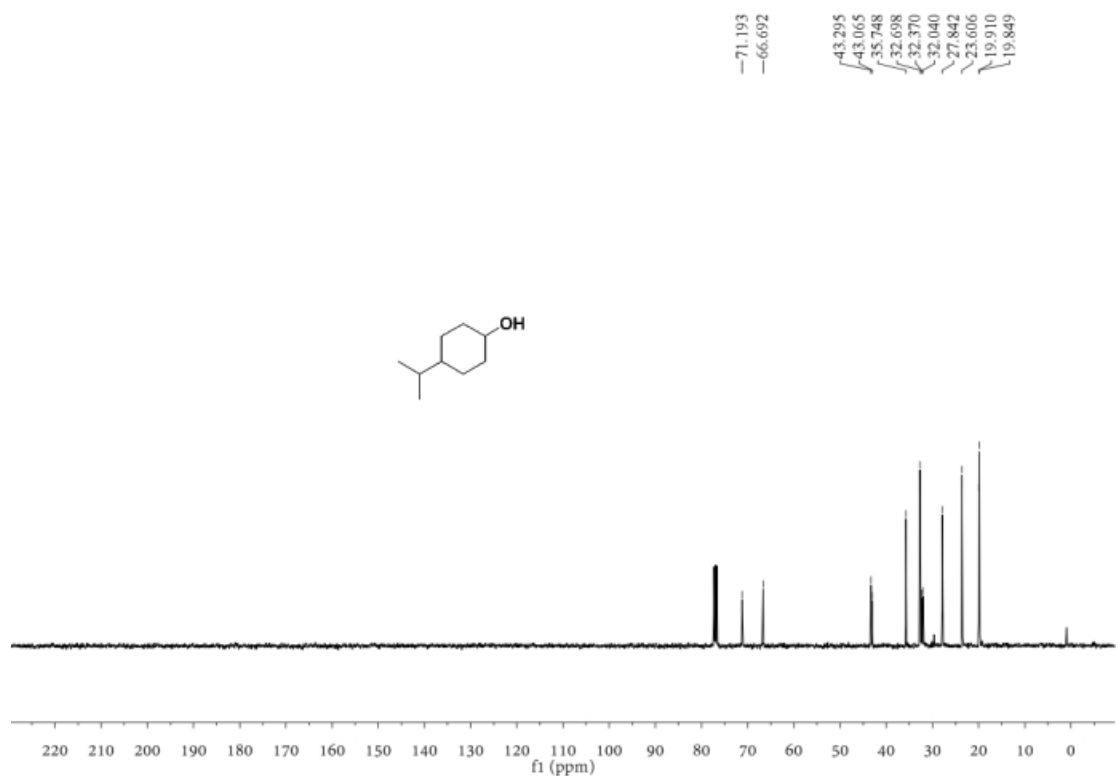

**Fig. S20** <sup>13</sup>C NMR (101 MHz, CDCl<sub>3</sub>, 298 K) spectrum of compound **10g**.

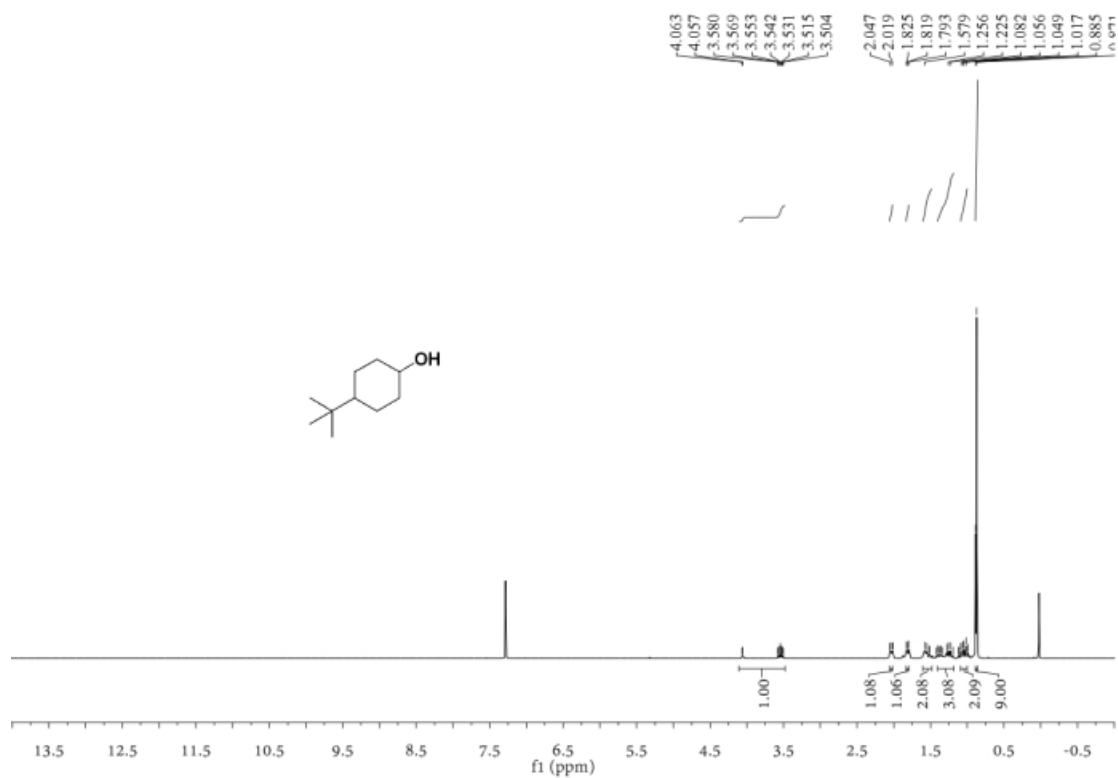

**Fig. S21** <sup>1</sup>H NMR (400 MHz, CDCl<sub>3</sub>, 298 K) spectrum of compound **10h**.

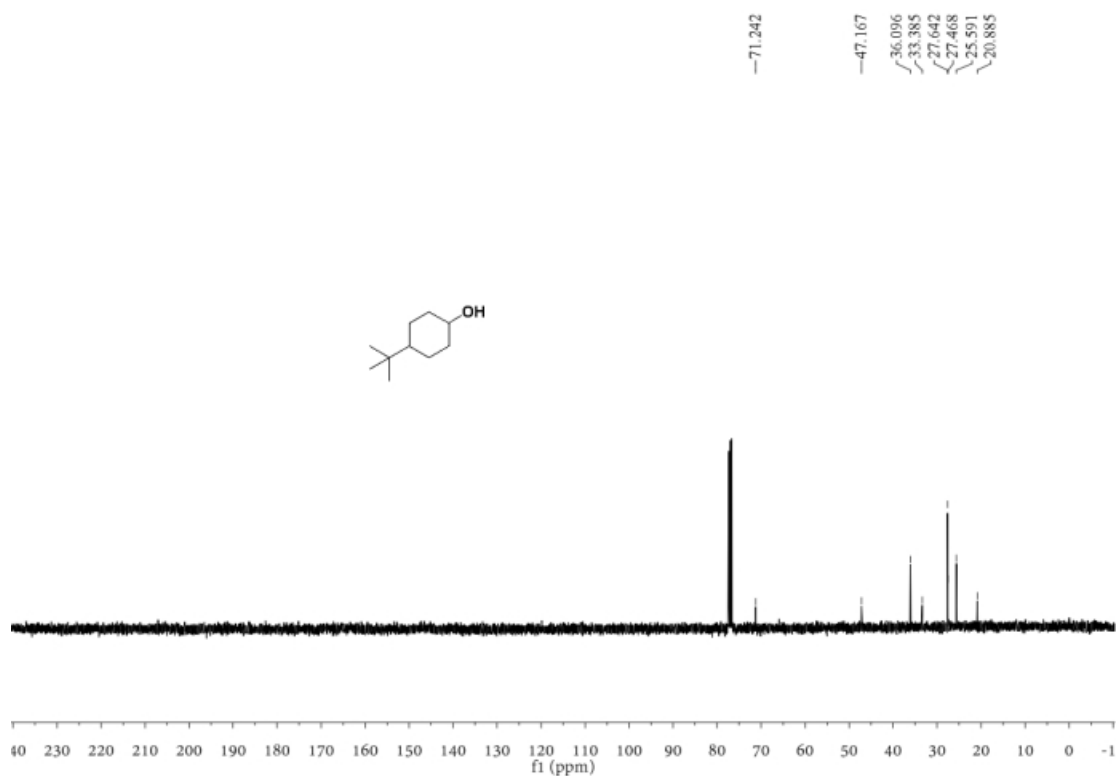

**Fig. S22** <sup>13</sup>C NMR (101 MHz, CDCl<sub>3</sub>, 298 K) spectrum of compound **10h**.

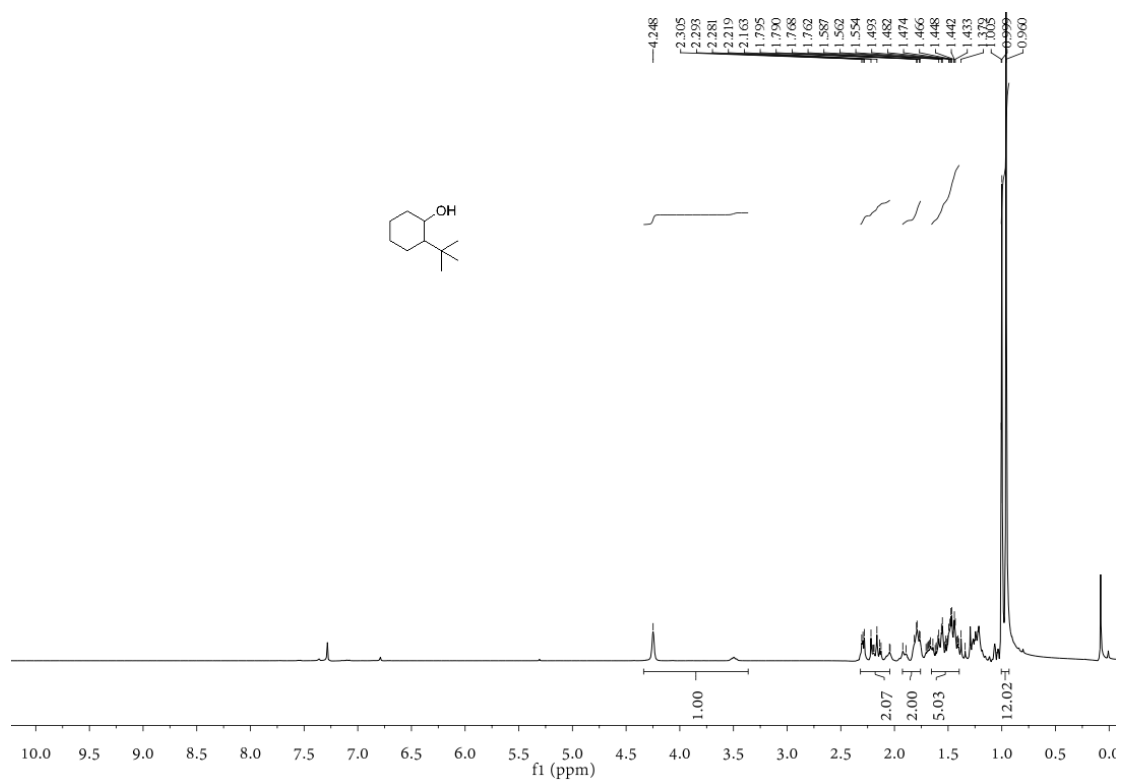

**Fig. S23** <sup>1</sup>H NMR (400 MHz, CDCl<sub>3</sub>, 298 K) spectrum of compound 10i.

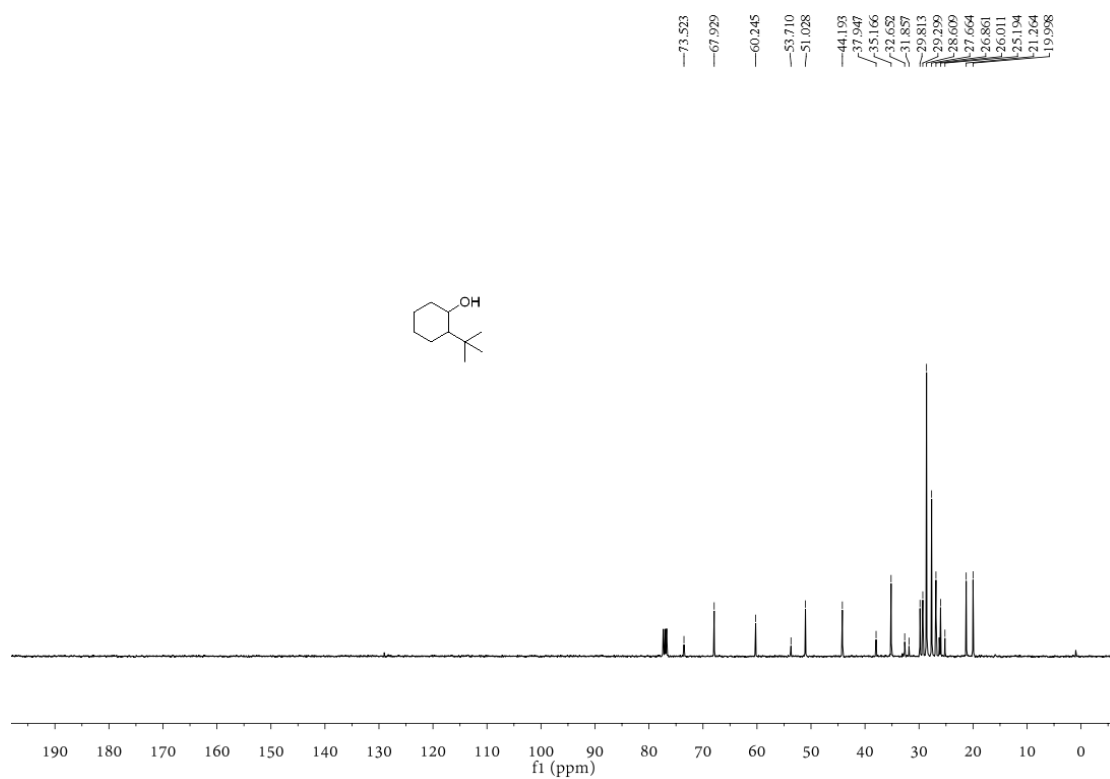

**Fig. S24** <sup>13</sup>C NMR (101 MHz, CDCl<sub>3</sub>, 298 K) spectrum of compound 10i.

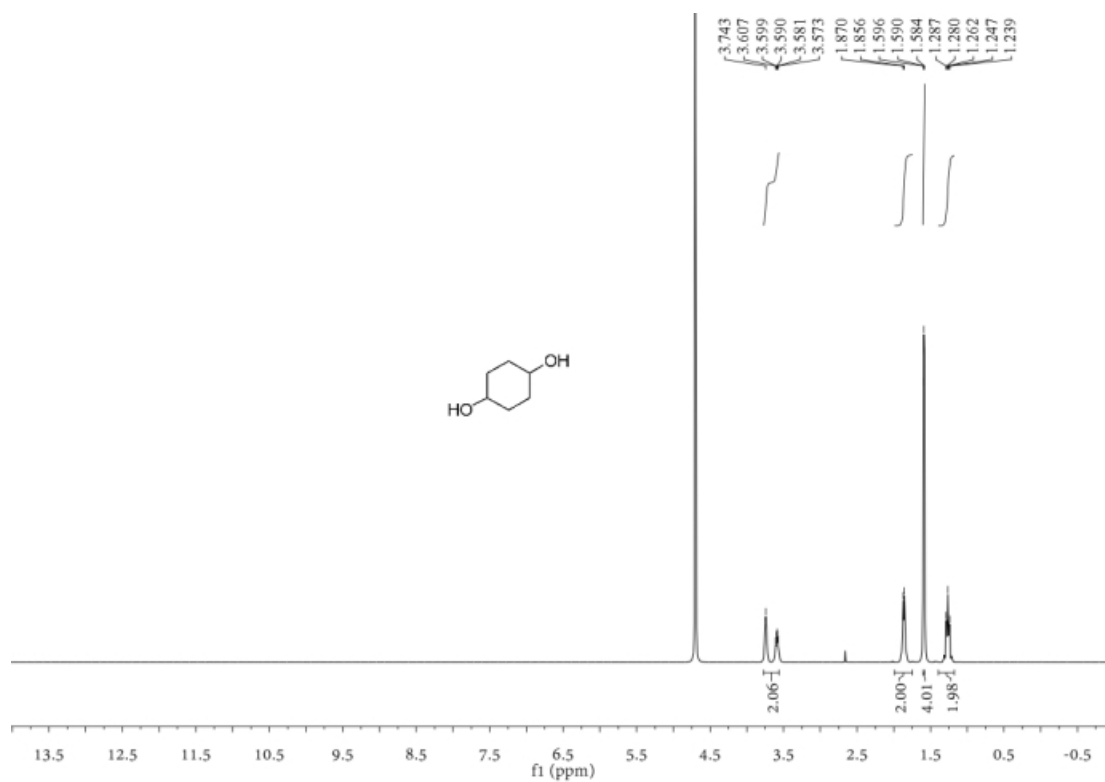

**Fig. S25** <sup>1</sup>H NMR (400 MHz, D<sub>2</sub>O, 298 K) spectrum of compound **10j**.

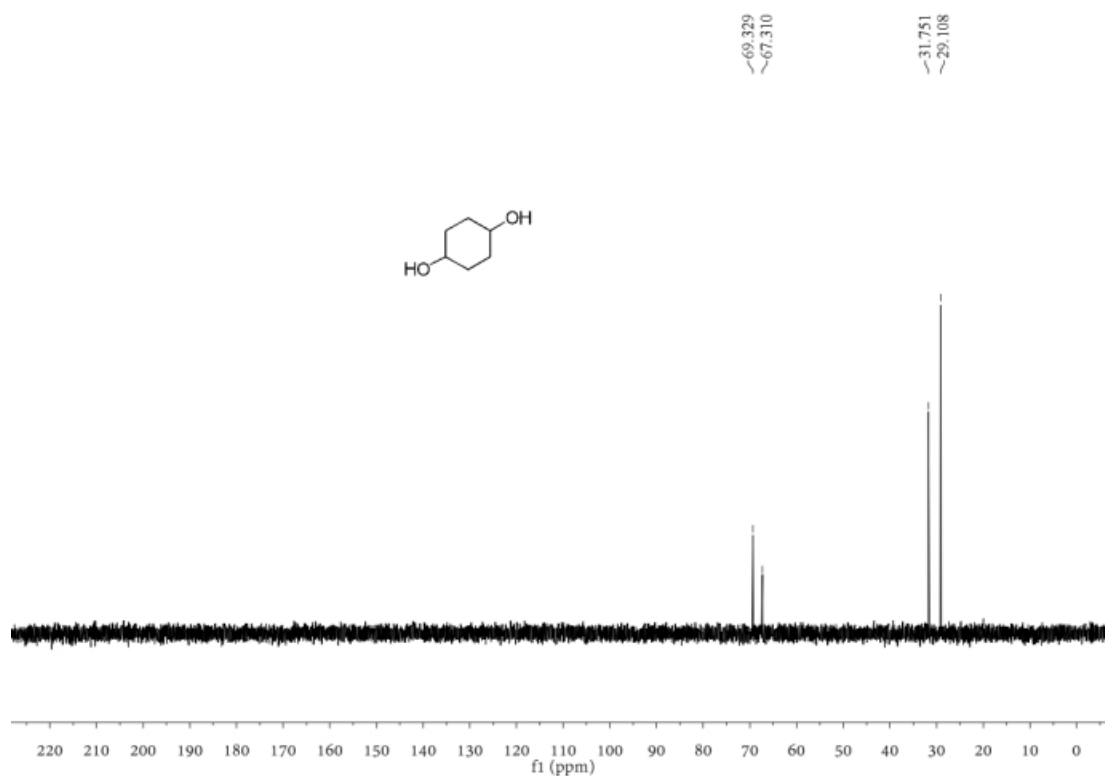

**Fig. S26** <sup>13</sup>C NMR (101 MHz, D<sub>2</sub>O, 298 K) spectrum of compound **10j**.

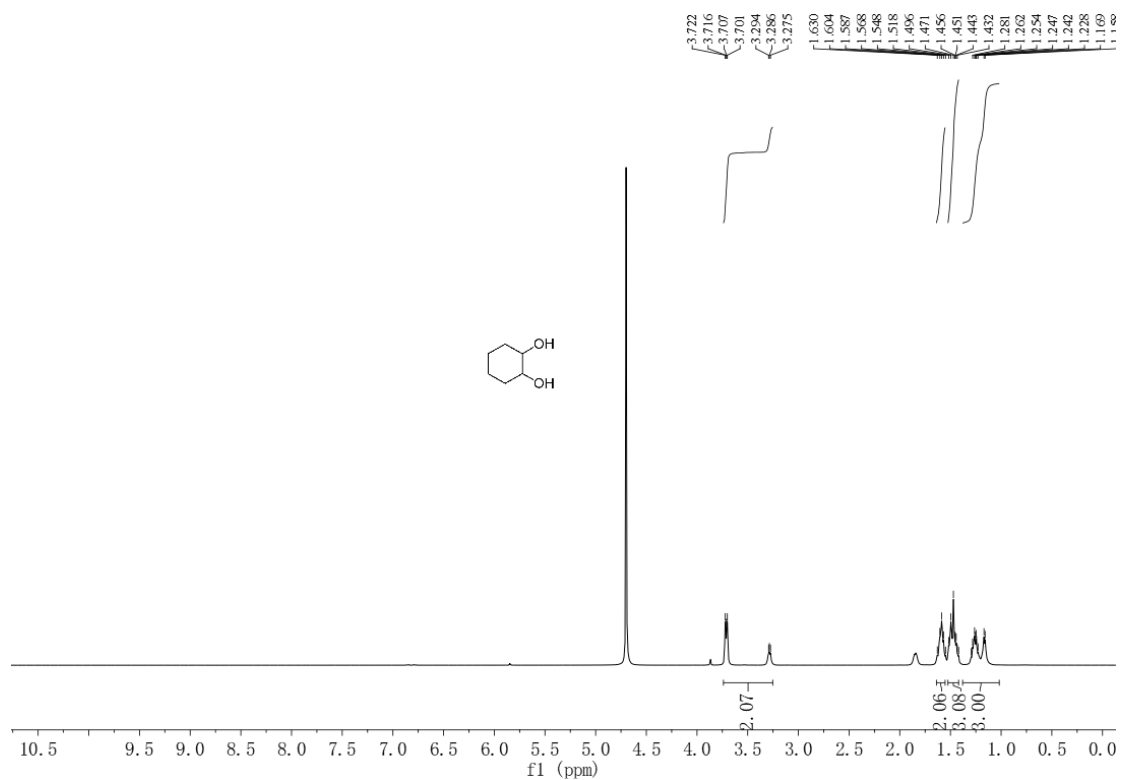

**Fig. S27**  $^1\text{H}$  NMR (400 MHz,  $\text{D}_2\text{O}$ , 298 K) spectrum of compound **10k**

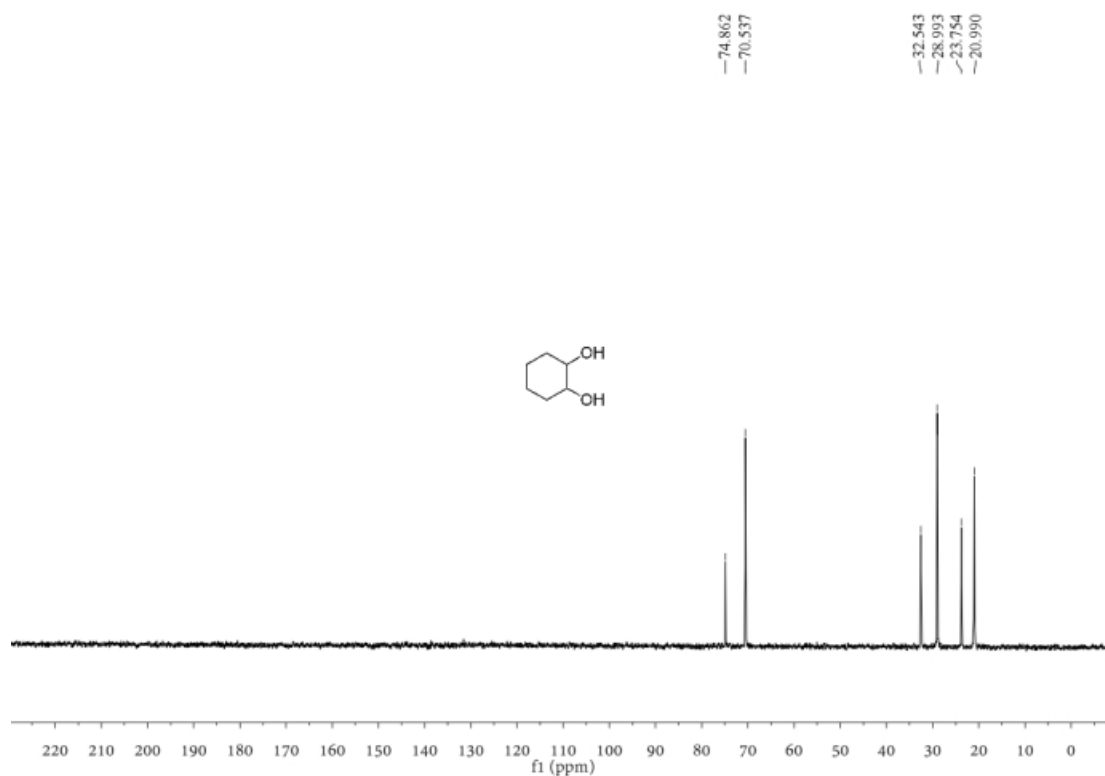

**Fig. S28**  $^{13}\text{C}$  NMR (101 MHz,  $\text{D}_2\text{O}$ , 298 K) spectrum of compound **10k**.

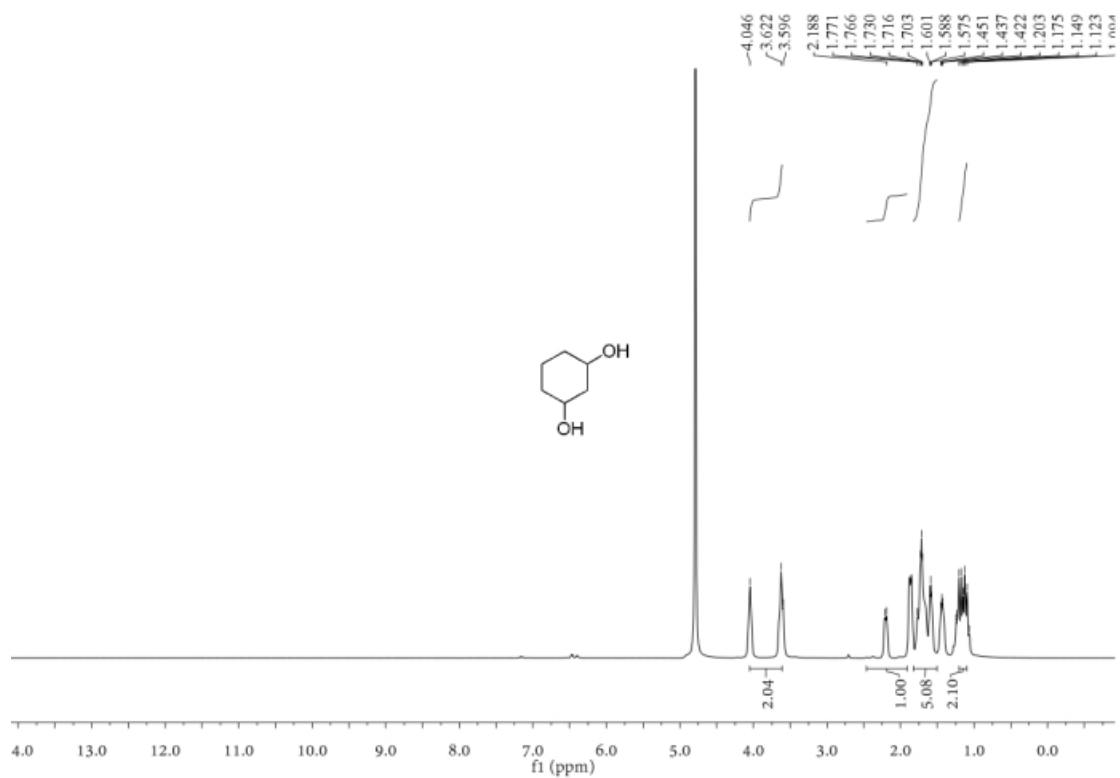

**Fig. S29** <sup>1</sup>H NMR (400 MHz, D<sub>2</sub>O, 298 K) spectrum of compound **10l**

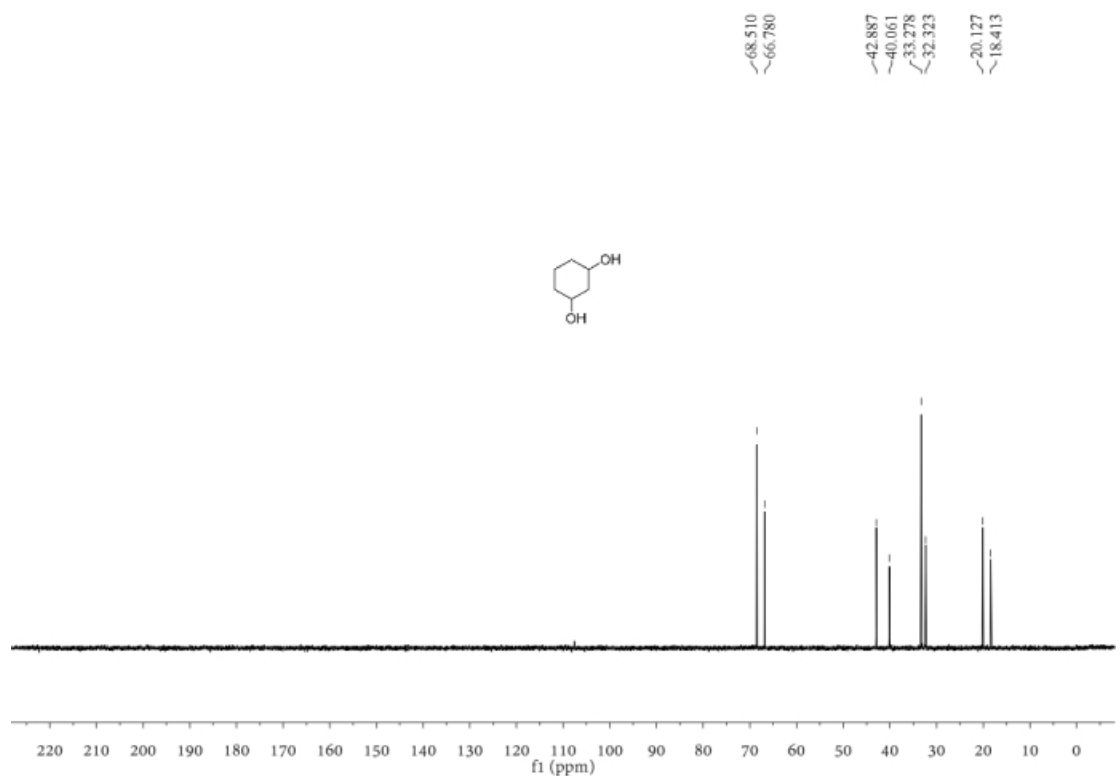

**Fig. S30** <sup>13</sup>C NMR (101 MHz, D<sub>2</sub>O, 298 K) spectrum of compound **10l**.

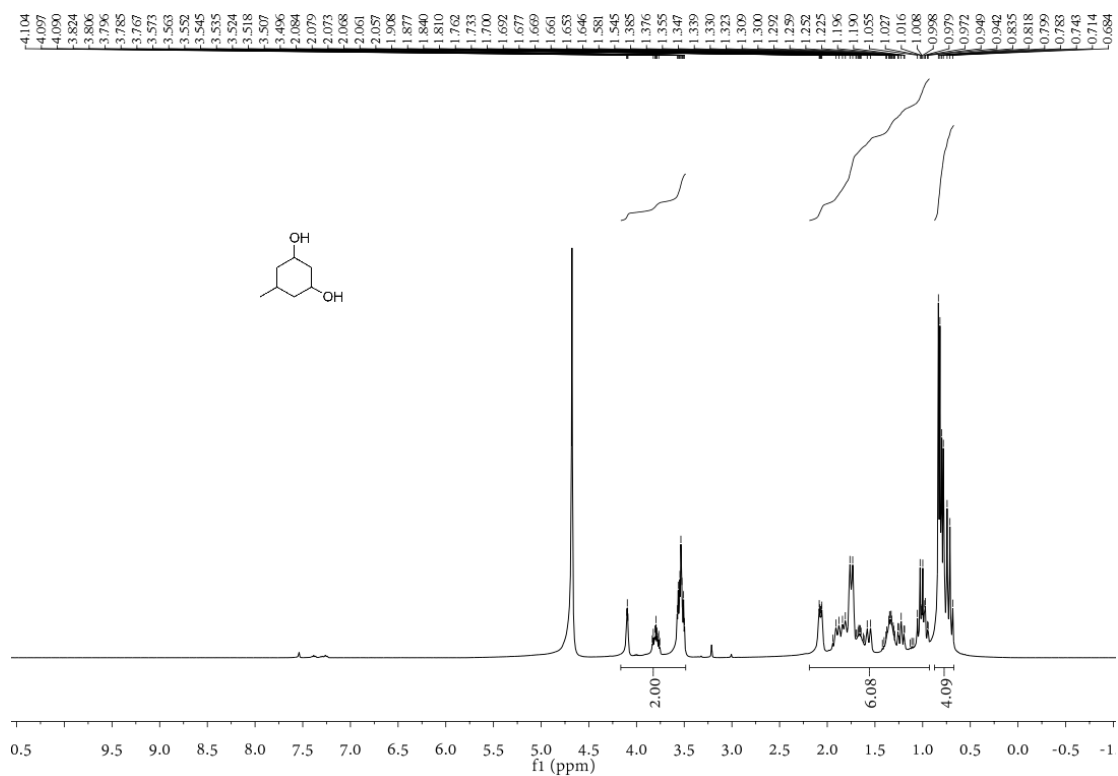

**Fig. S31**  $^1\text{H}$  NMR (400 MHz,  $\text{D}_2\text{O}$ , 298 K) spectrum of compound **10m**

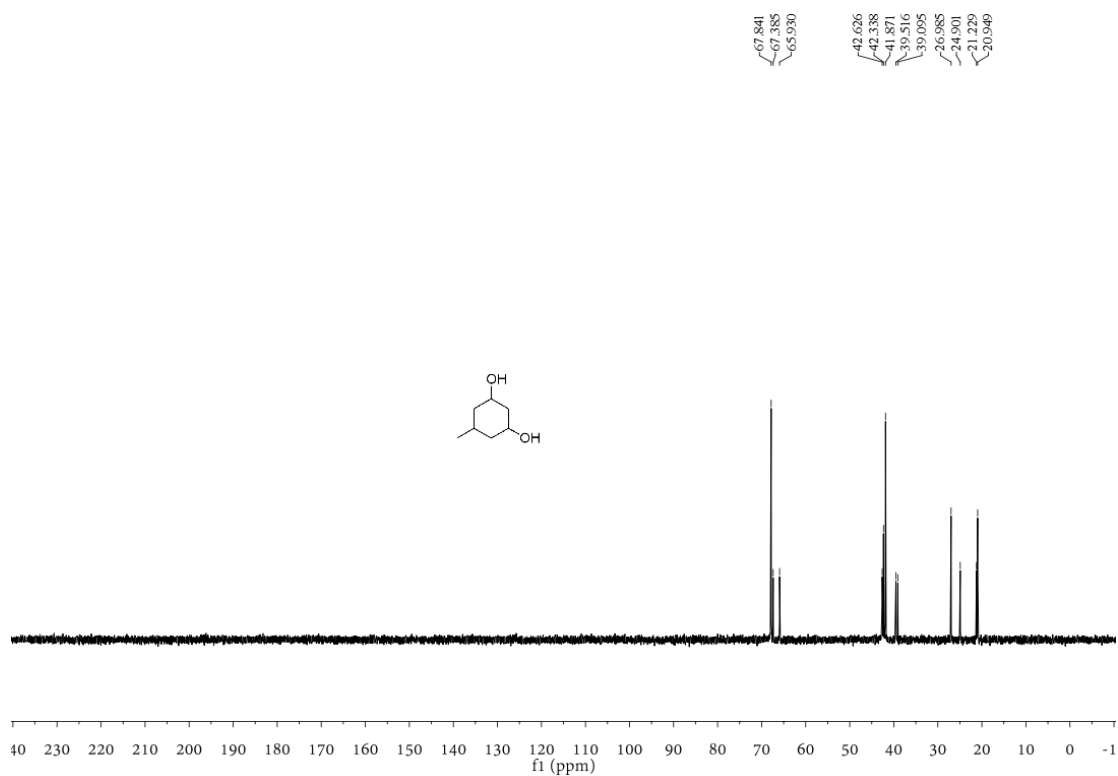

**Fig. S32**  $^{13}\text{C}$  NMR (101 MHz,  $\text{D}_2\text{O}$ , 298 K) spectrum of compound **10m**.

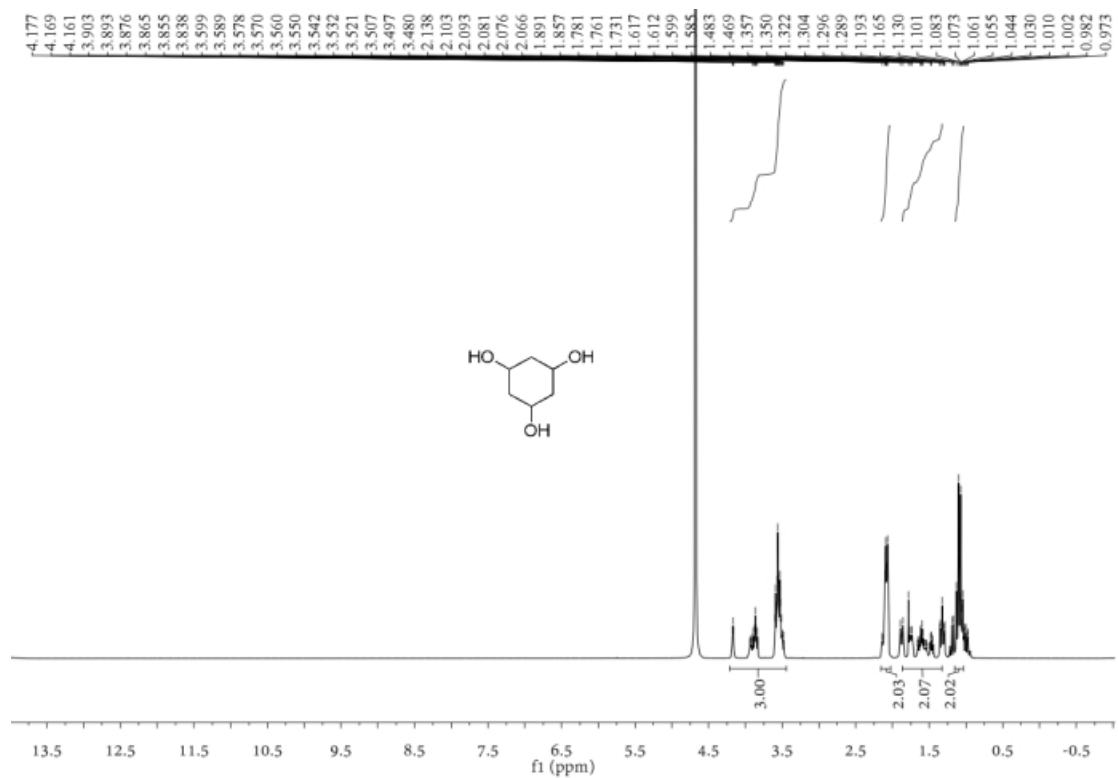

**Fig. S33**  $^1\text{H}$  NMR (400 MHz,  $\text{D}_2\text{O}$ , 298 K) spectrum of compound **10n**

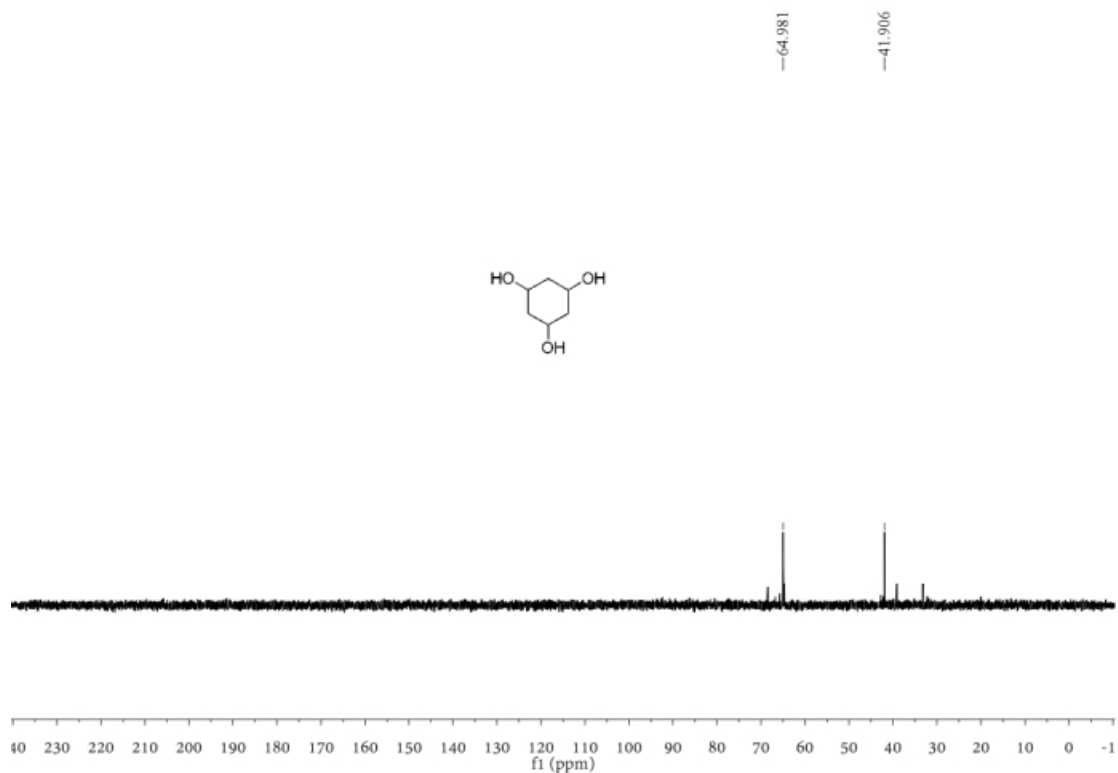

**Fig. S34**  $^{13}\text{C}$  NMR (101 MHz,  $\text{D}_2\text{O}$ , 298 K) spectrum of compound **10n**.



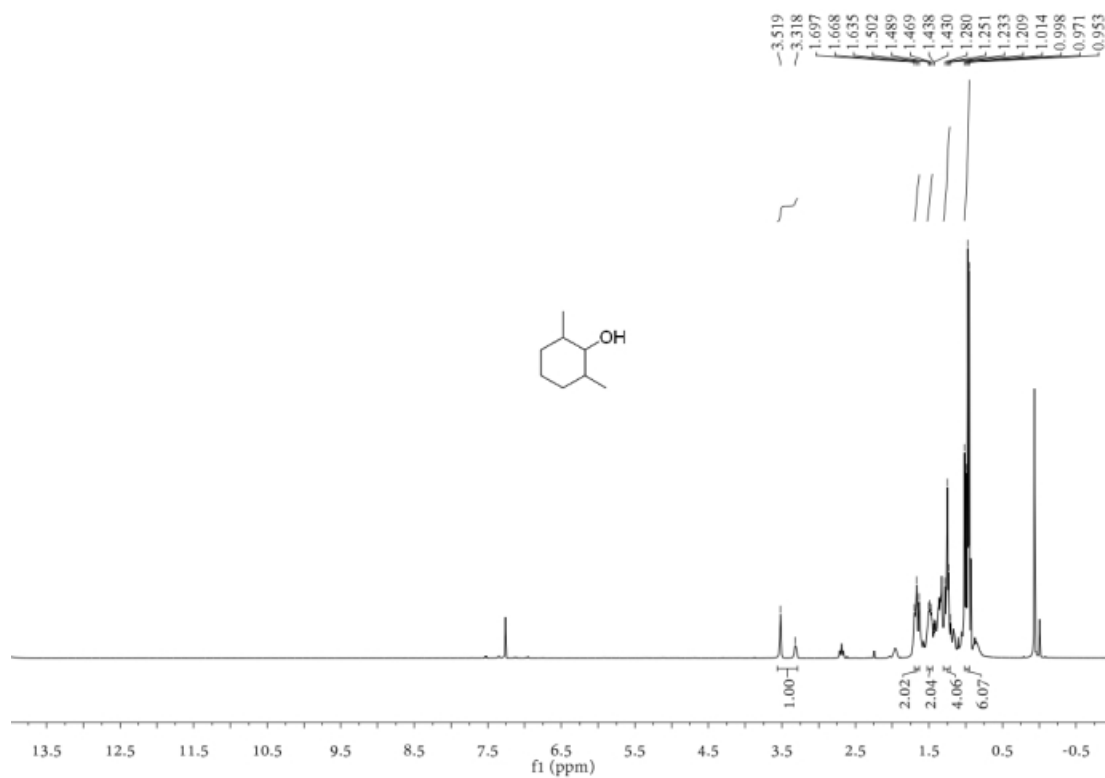

**Fig. S35** <sup>1</sup>H NMR (400 MHz, CDCl<sub>3</sub>, 298 K) spectrum of compound **10o**

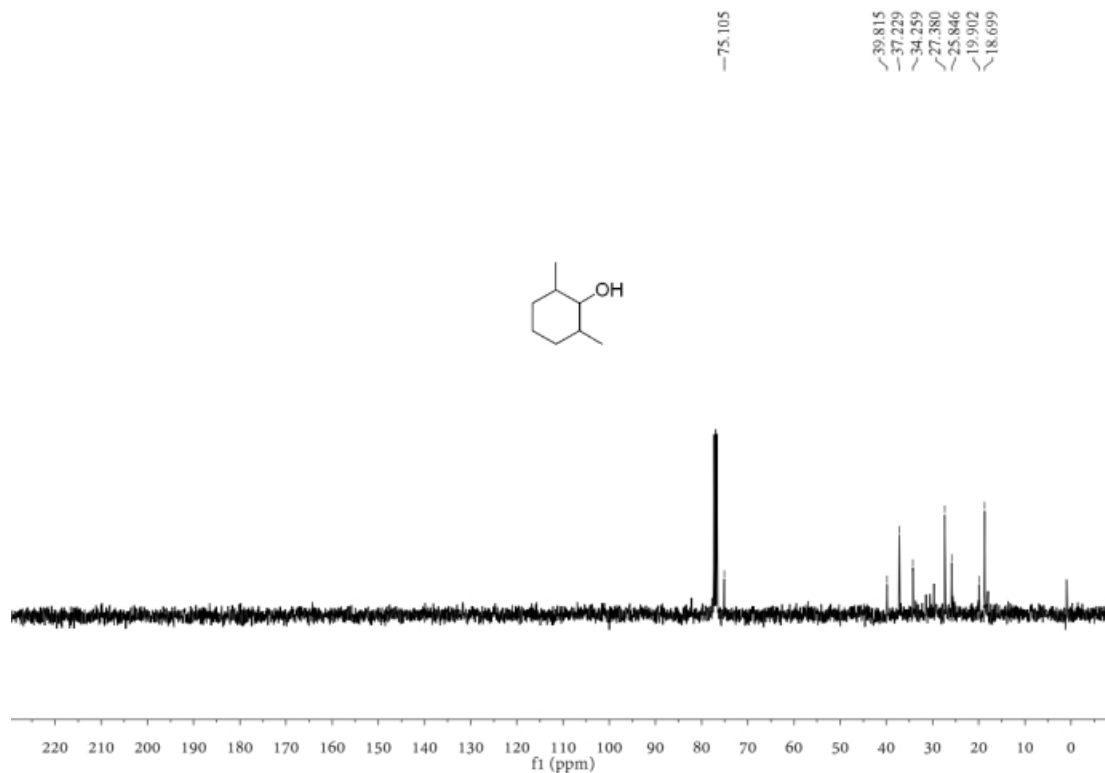

**Fig. S36** <sup>13</sup>C NMR (101 MHz, CDCl<sub>3</sub>, 298 K) spectrum of compound **10o**.

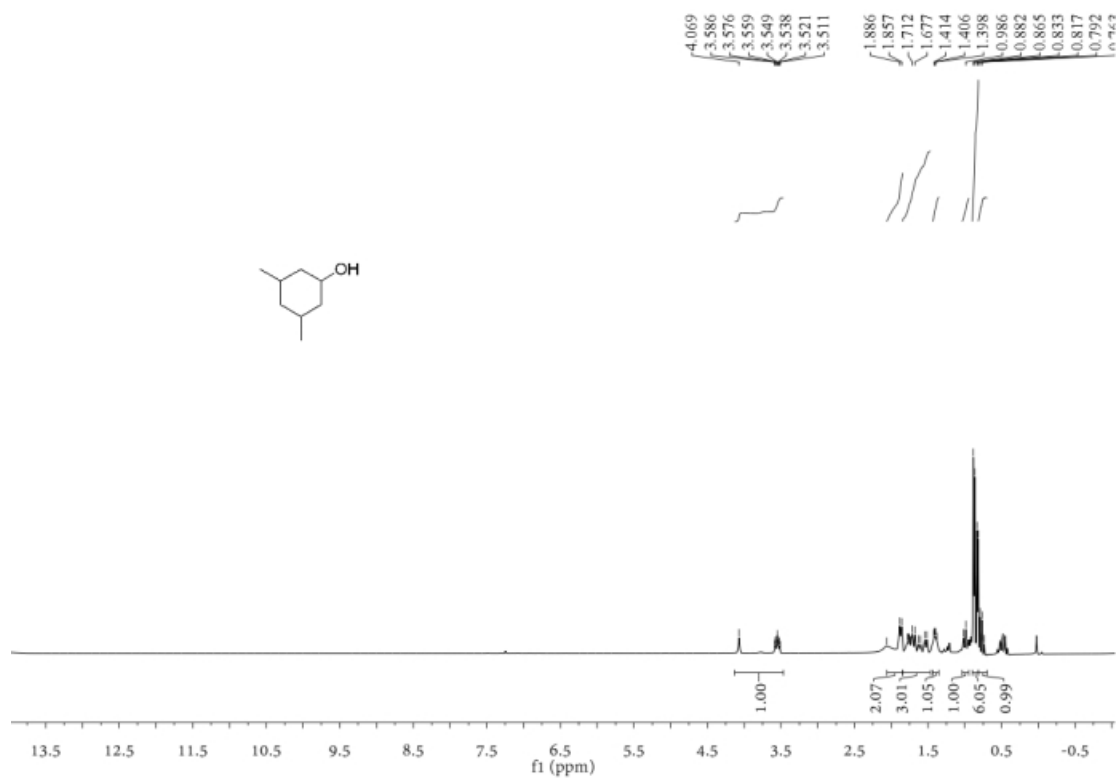

**Fig. S37** <sup>1</sup>H NMR (400 MHz, CDCl<sub>3</sub>, 298 K) spectrum of compound 10p

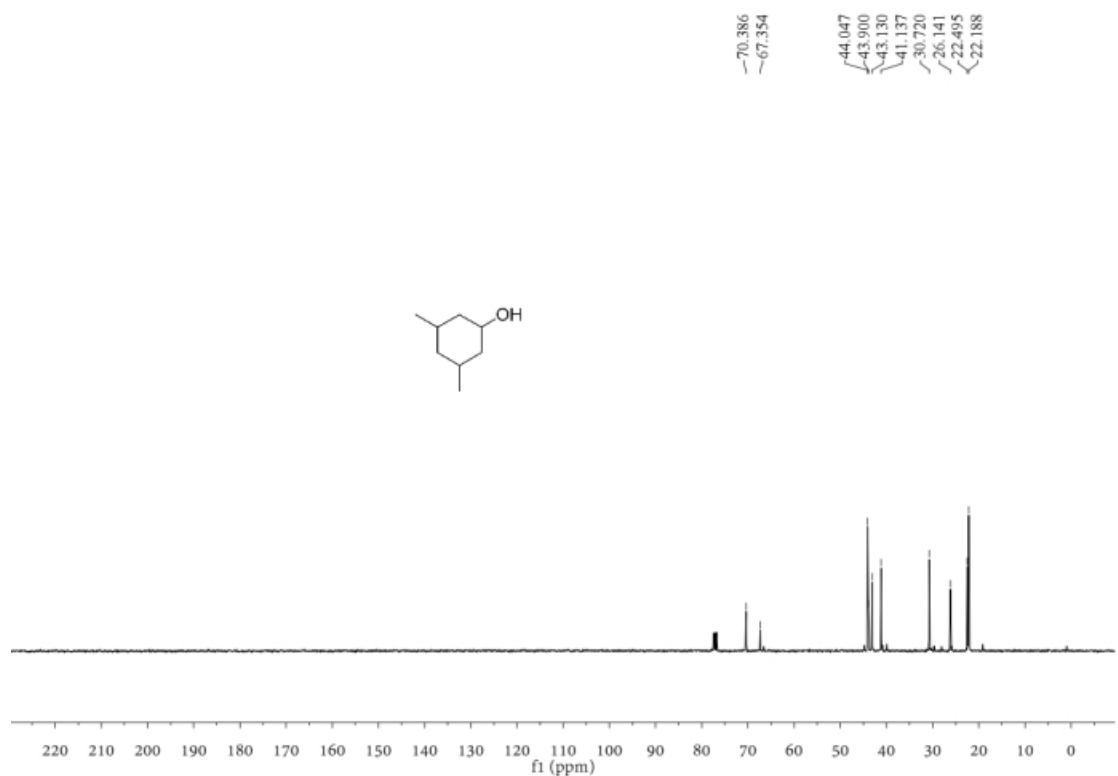

**Fig. S38** <sup>13</sup>C NMR (101 MHz, CDCl<sub>3</sub>, 298 K) spectrum of compound 10p.

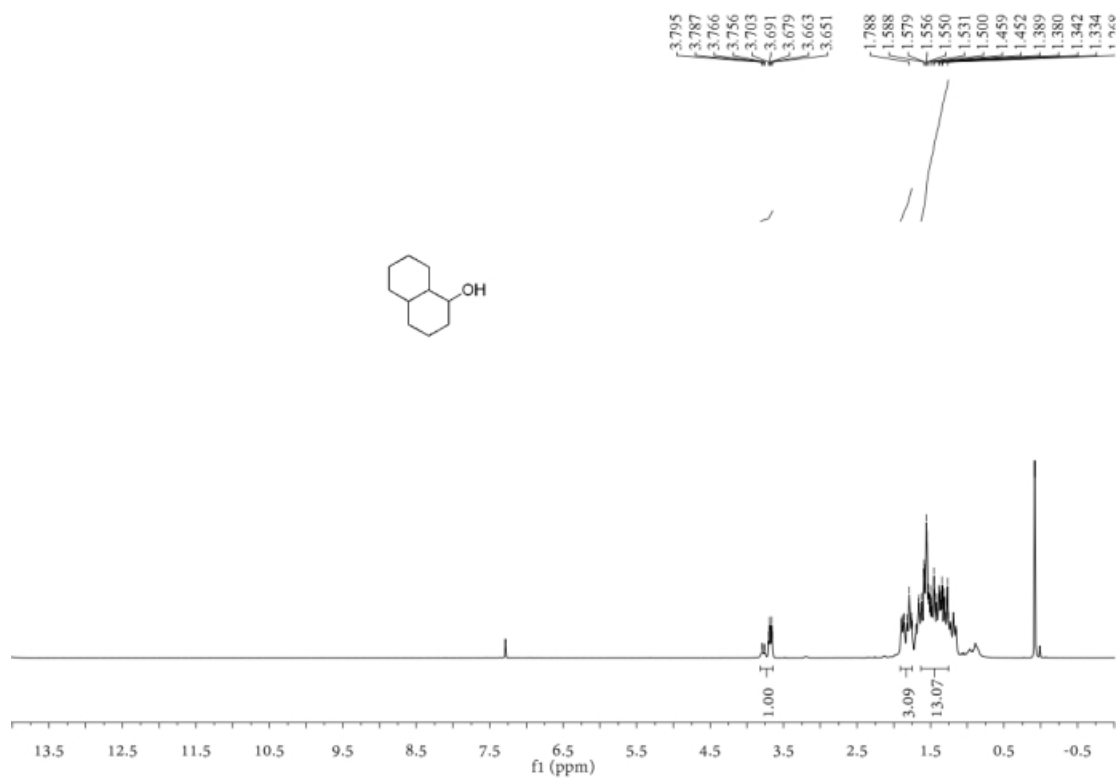

**Fig. S39** <sup>1</sup>H NMR (400 MHz, CDCl<sub>3</sub>, 298 K) spectrum of compound **10q**

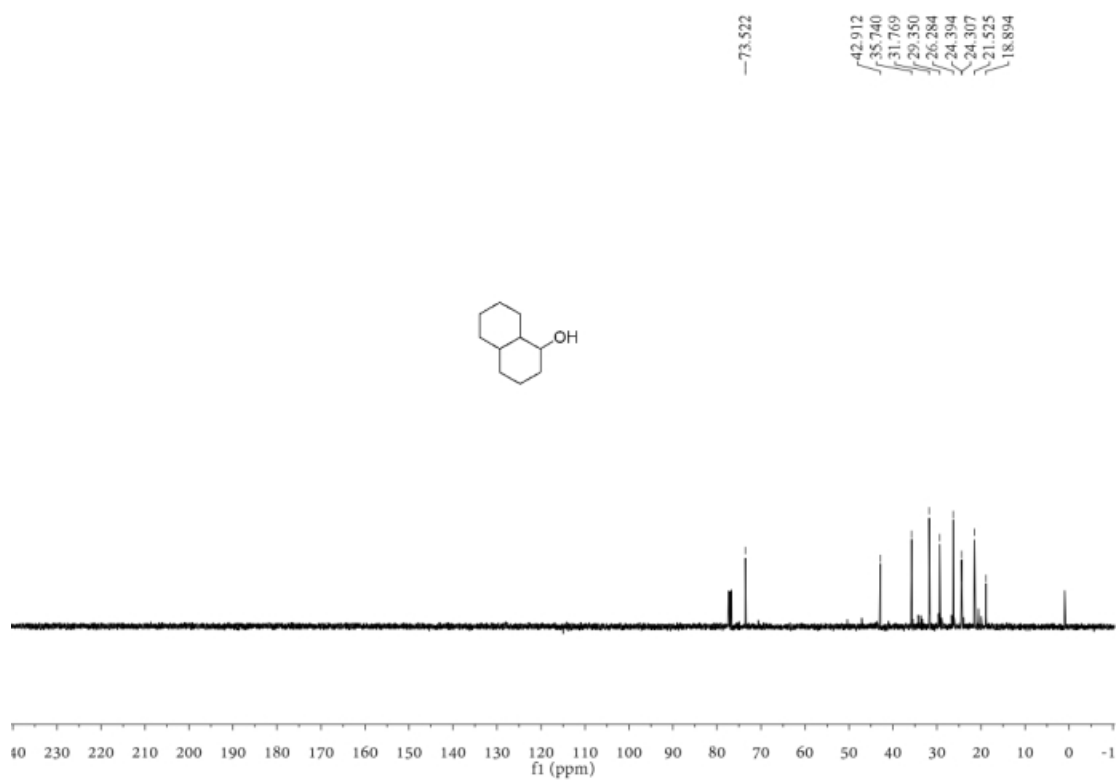

**Fig. S40** <sup>13</sup>C NMR (101 MHz, CDCl<sub>3</sub>, 298 K) spectrum of compound **10q**.

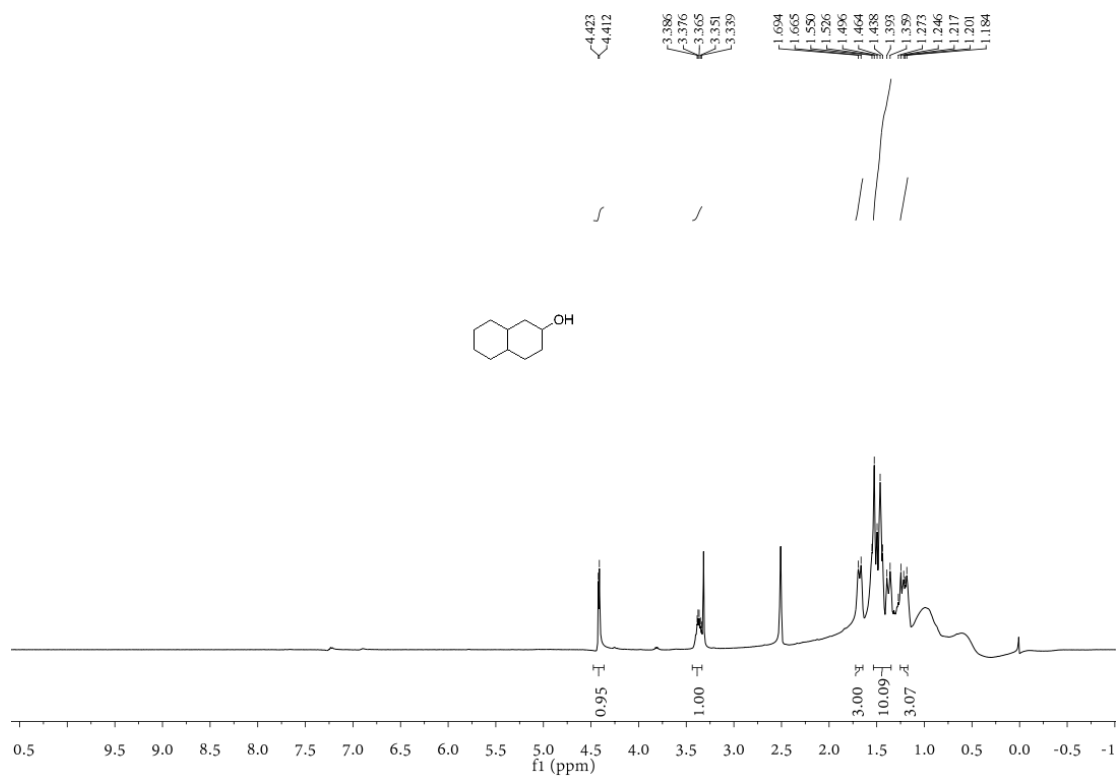

**Fig. S41** <sup>1</sup>H NMR (400 MHz, DMSO-*d*<sub>6</sub>, 298 K) spectrum of compound **10r**

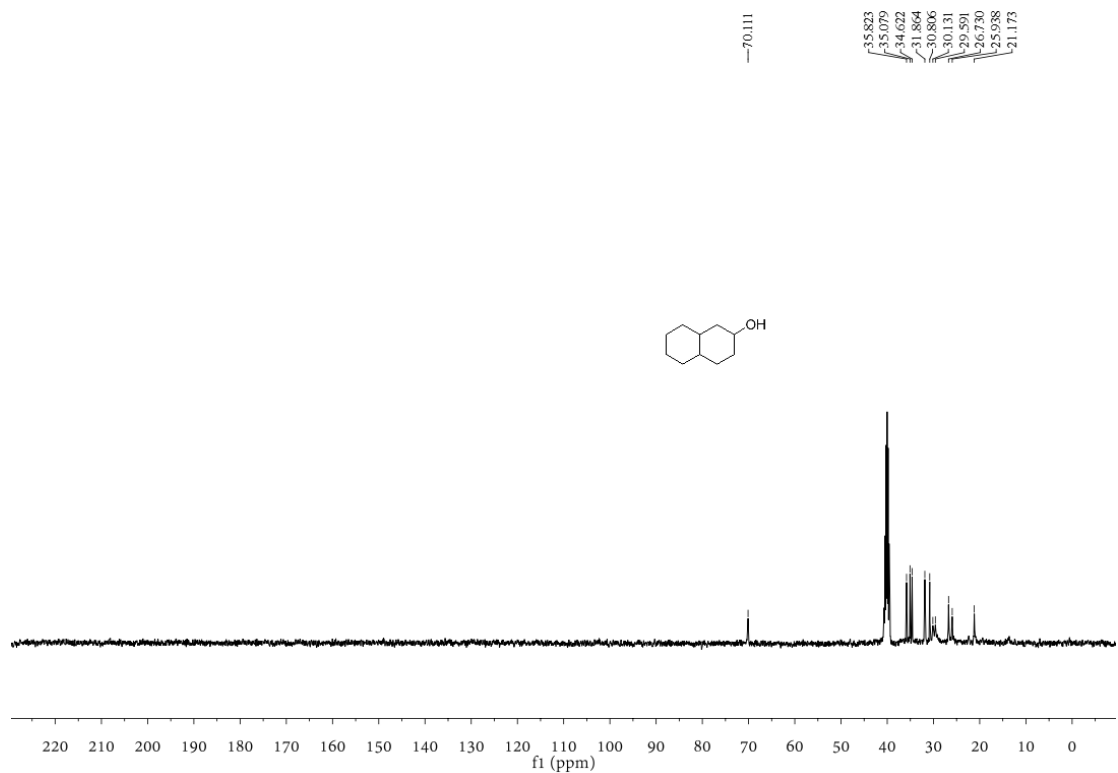

**Fig. S42** <sup>13</sup>C NMR (101 MHz, DMSO-*d*<sub>6</sub>, 298 K) spectrum of compound **10r**.

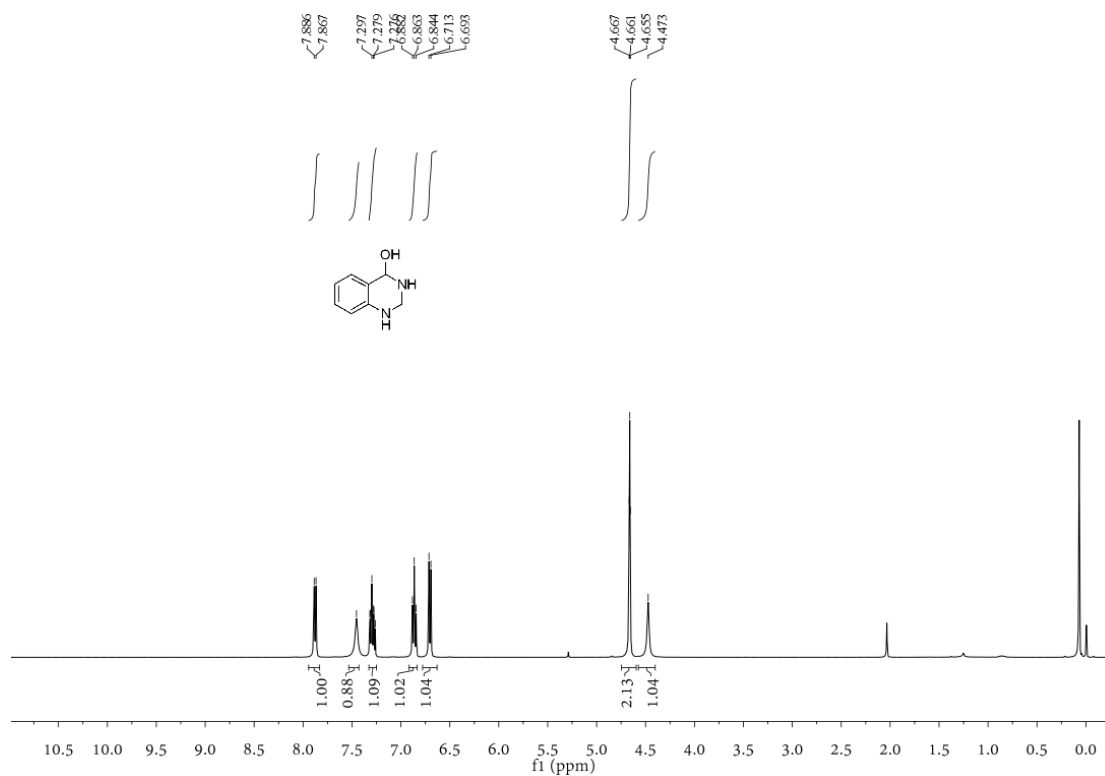

**Fig. S43**  $^1\text{H NMR}$  (400 MHz,  $\text{CDCl}_3$ , 298 K) spectrum of compound 10s.

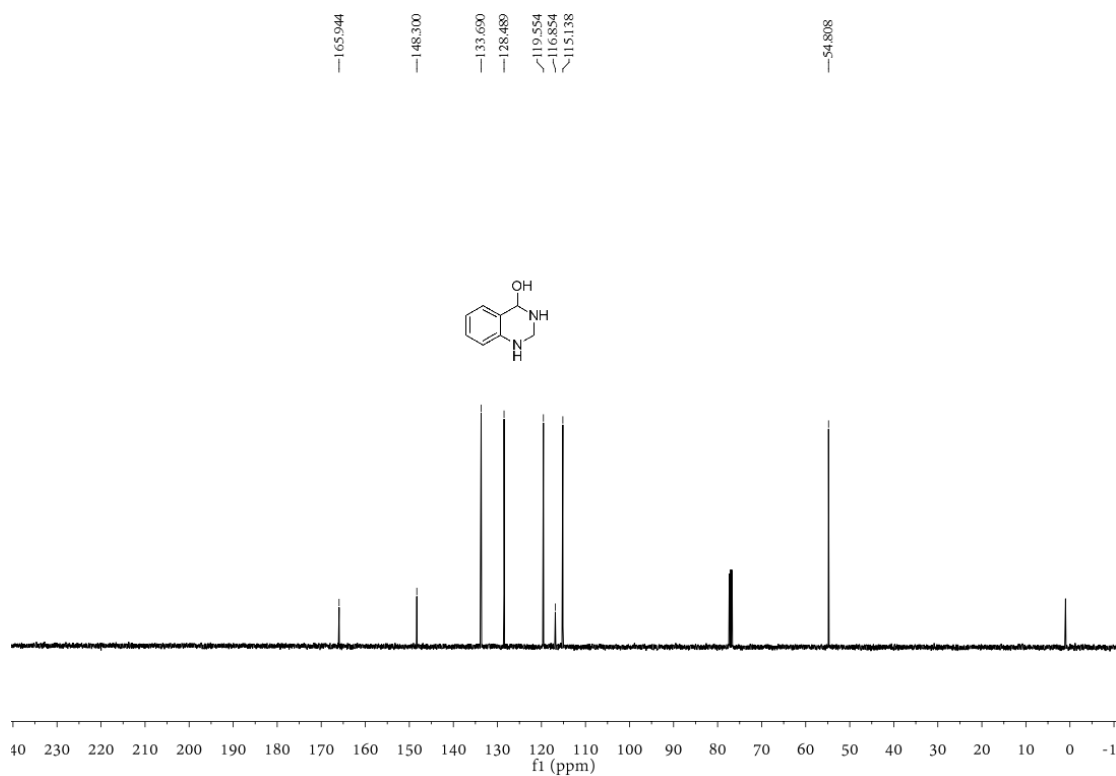

**Fig. S44**  $^{13}\text{C NMR}$  (101 MHz,  $\text{CDCl}_3$ , 298 K) spectrum of compound 10s.

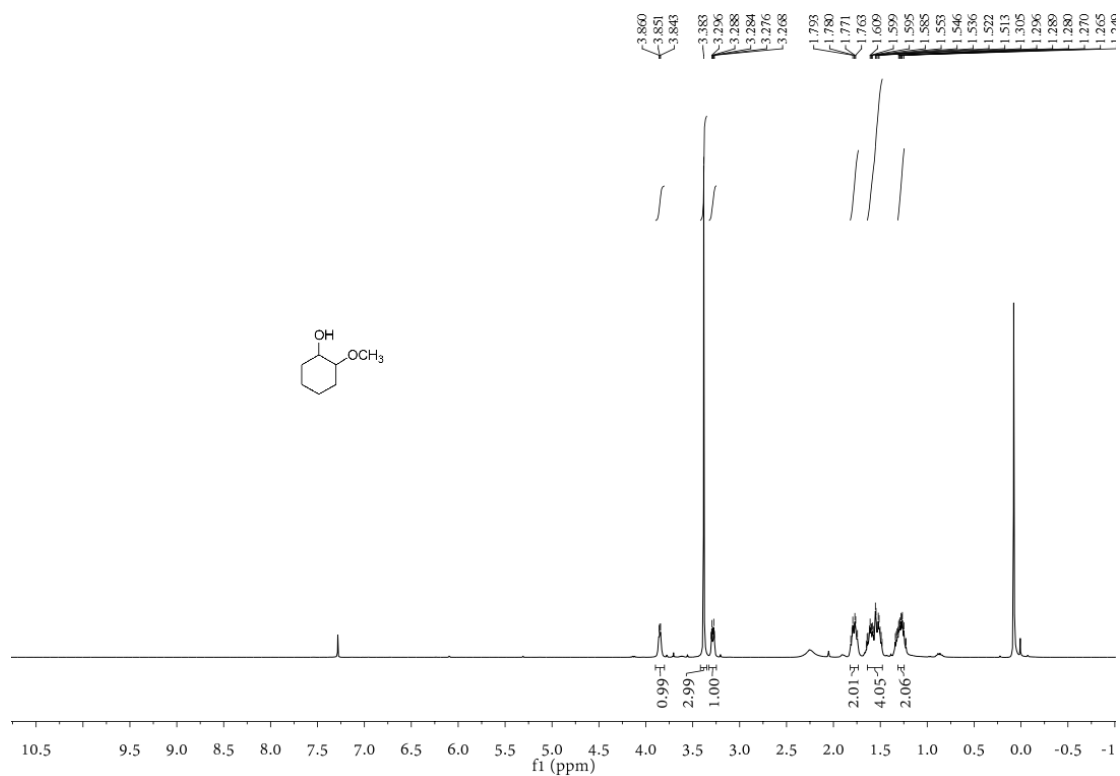

**Fig. S45**  $^1\text{H}$  NMR (400 MHz,  $\text{CDCl}_3$ , 298 K) spectrum of compound **10t**.

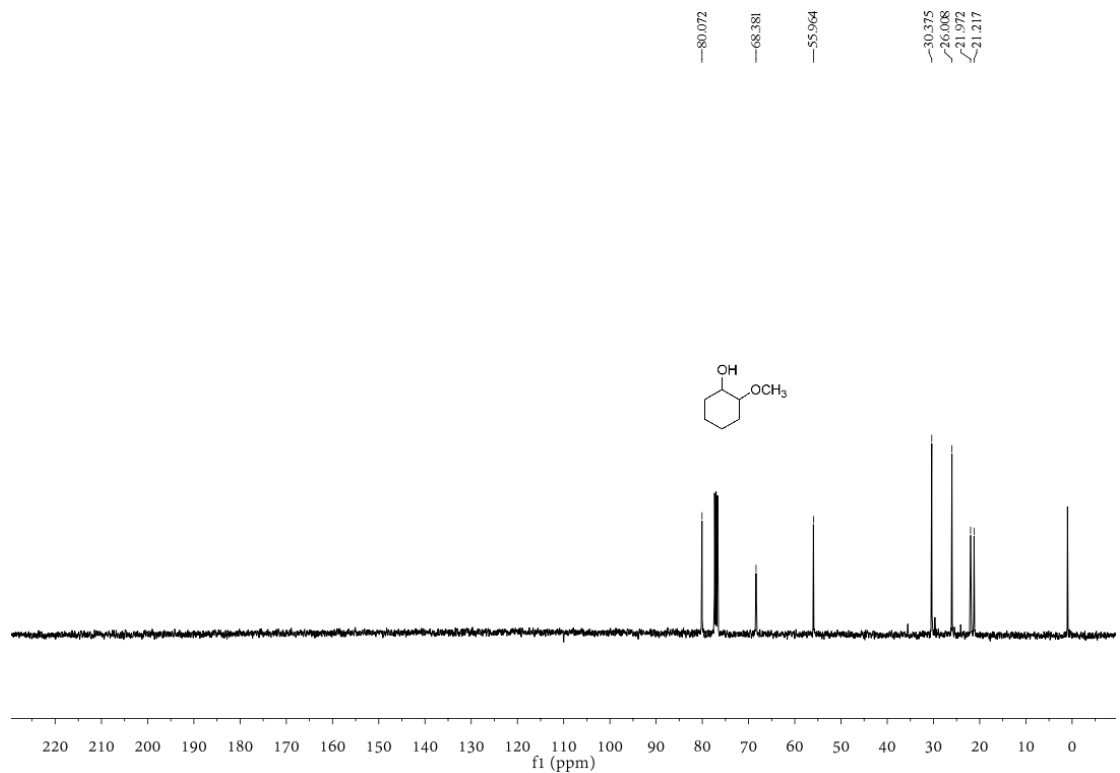

**Fig. S46**  $^{13}\text{C}$  NMR (101 MHz,  $\text{CDCl}_3$ , 298 K) spectrum of compound **10t**.

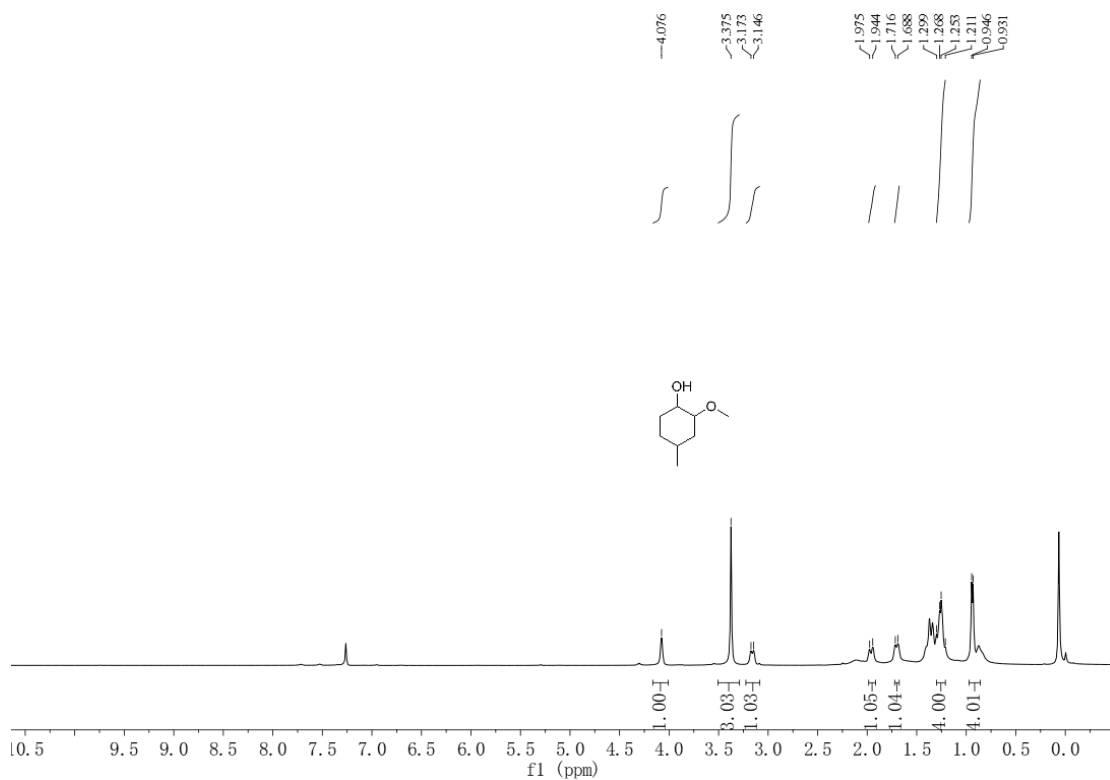

**Fig. S47**  $^1\text{H}$  NMR (400 MHz,  $\text{CDCl}_3$ , 298 K) spectrum of compound **10u**.

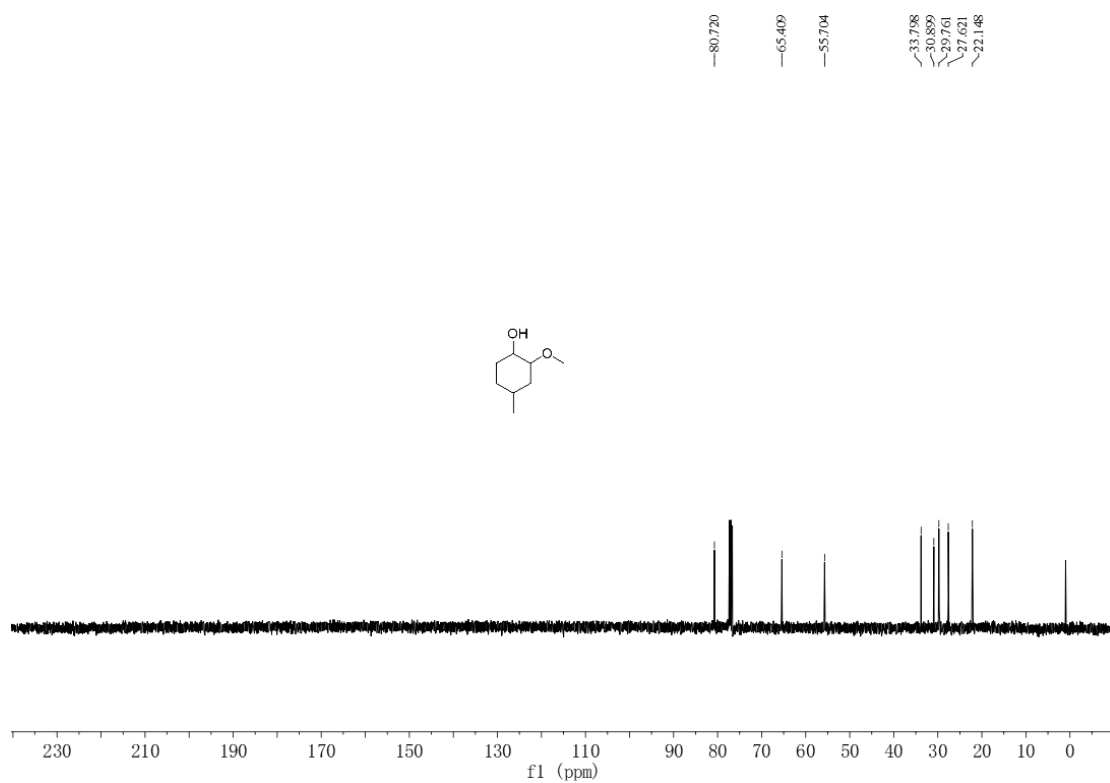

**Fig. S48**  $^{13}\text{C}$  NMR (101 MHz,  $\text{CDCl}_3$ , 298 K) spectrum of compound **10u**.

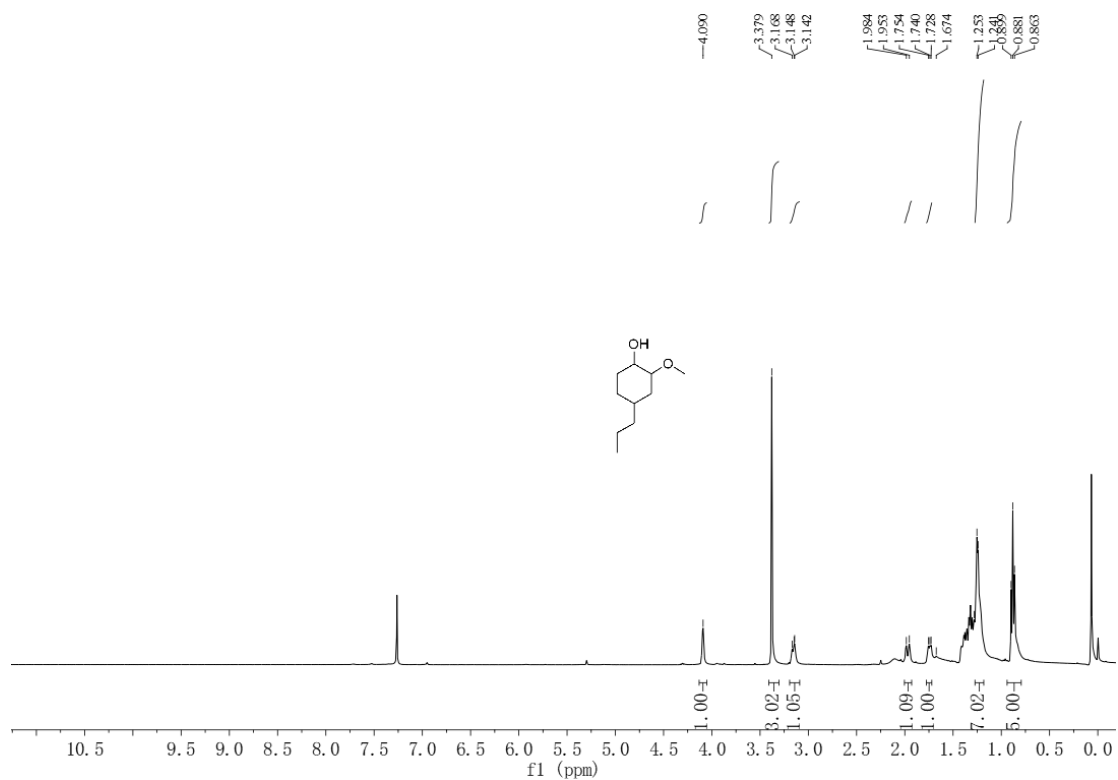

**Fig. S49**  $^1\text{H NMR}$  (400 MHz,  $\text{CDCl}_3$ , 298 K) spectrum of compound 10v.

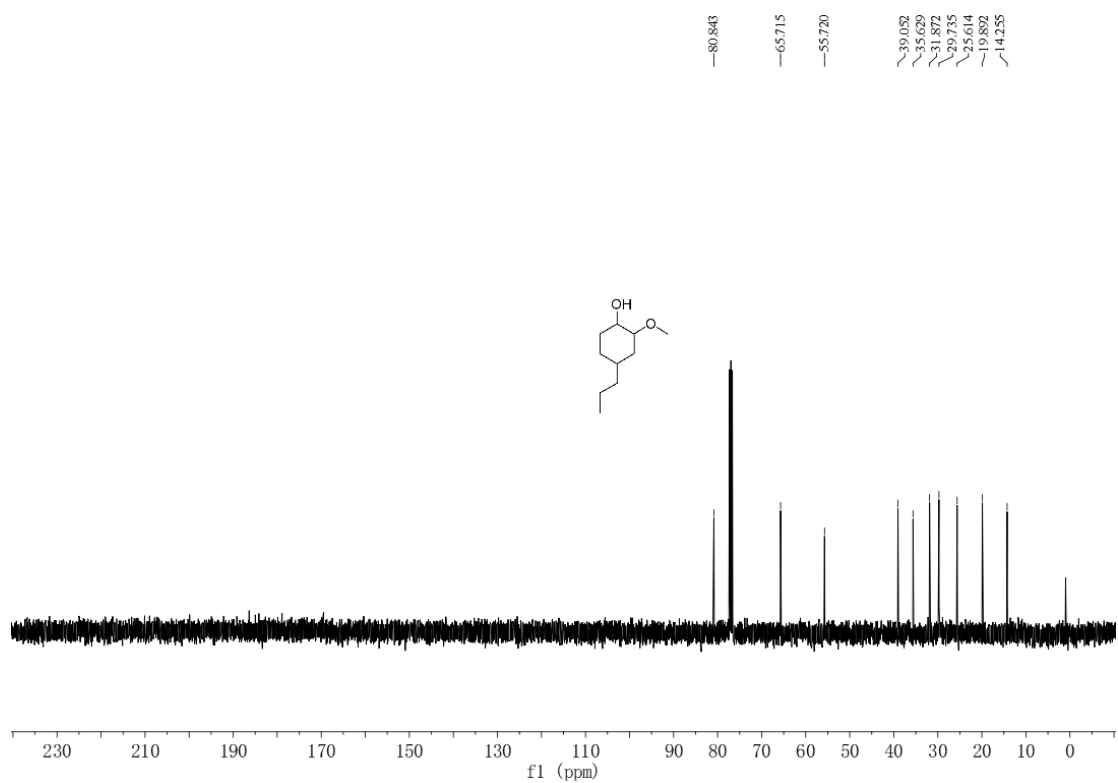

**Fig. S50**  $^{13}\text{C NMR}$  (101 MHz,  $\text{CDCl}_3$ , 298 K) spectrum of compound 10v.



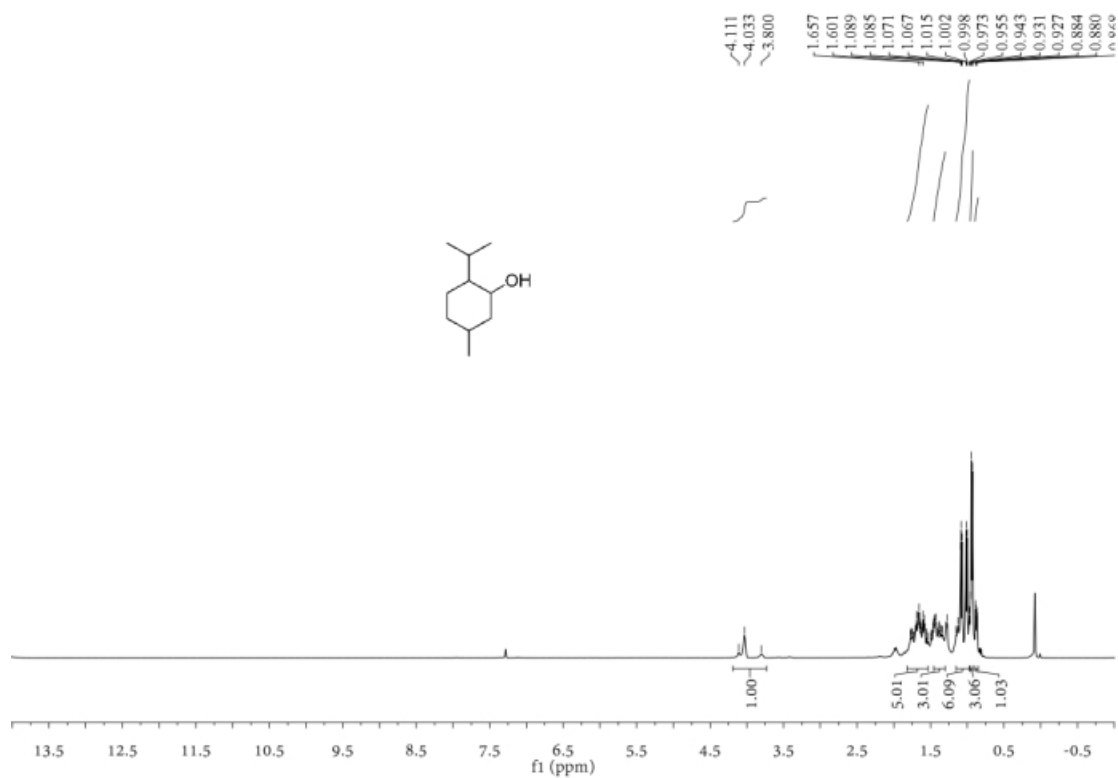

**Fig. S51**  $^1\text{H NMR}$  (400 MHz,  $\text{CDCl}_3$ , 298 K) spectrum of compound 10w.

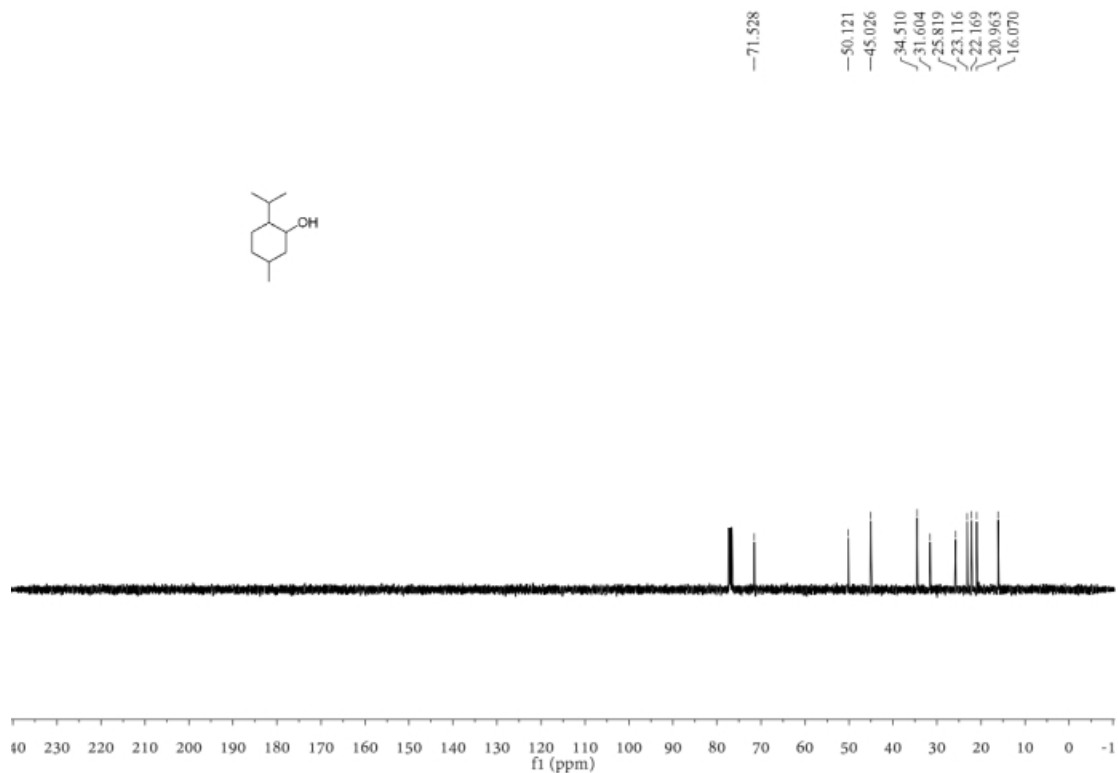

**Fig. S52**  $^{13}\text{C NMR}$  (101 MHz,  $\text{CDCl}_3$ , 298 K) spectrum of compound 10w.

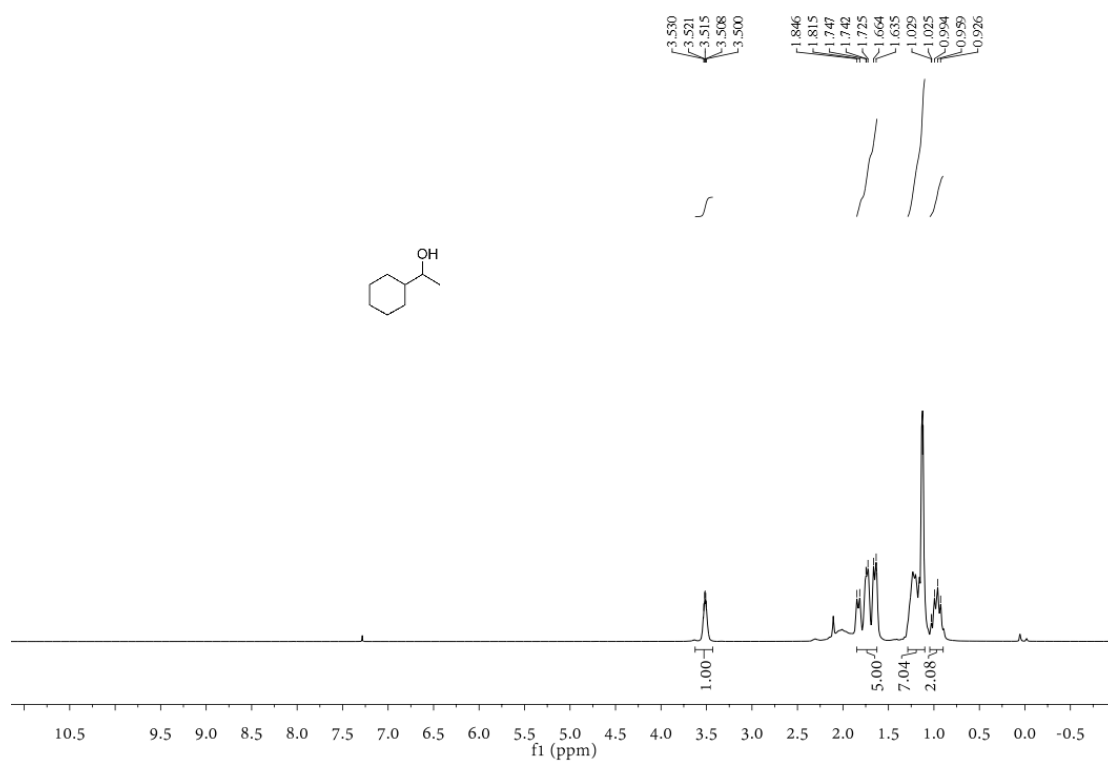

**Fig. S53** <sup>1</sup>H NMR (400 MHz, CDCl<sub>3</sub>, 298 K) spectrum of compound **10x**.

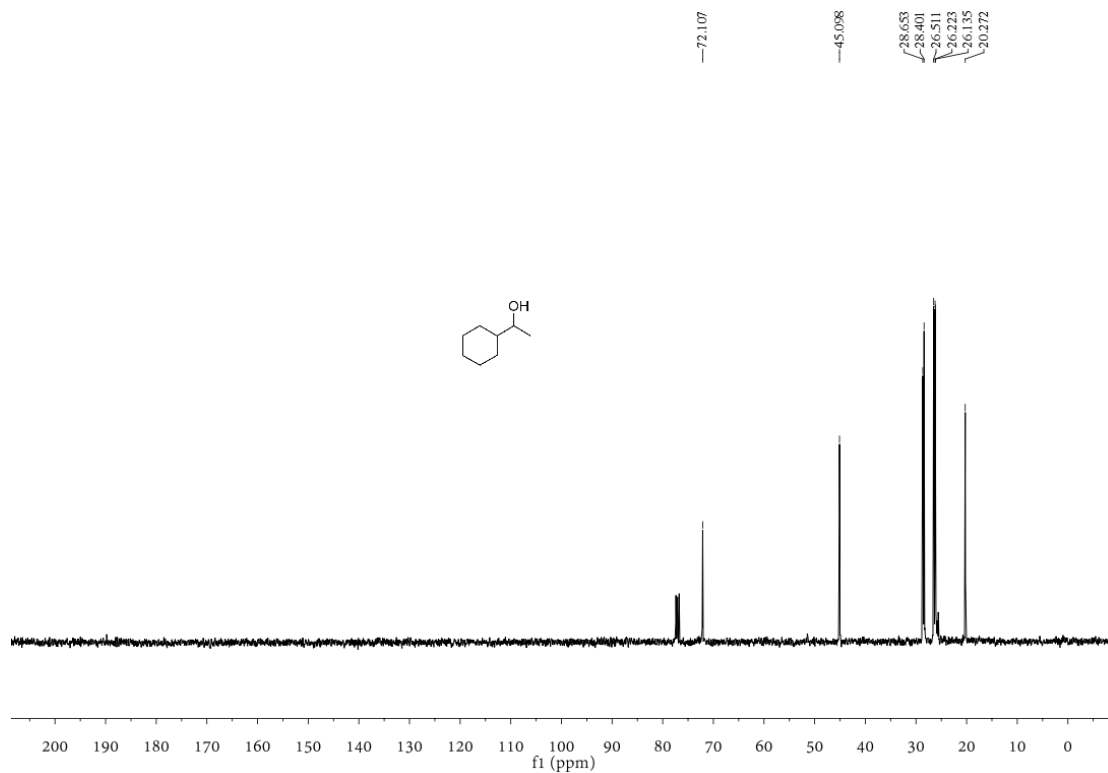

**Fig. S54** <sup>13</sup>C NMR (101 MHz, CDCl<sub>3</sub>, 298 K) spectrum of compound **10x**.

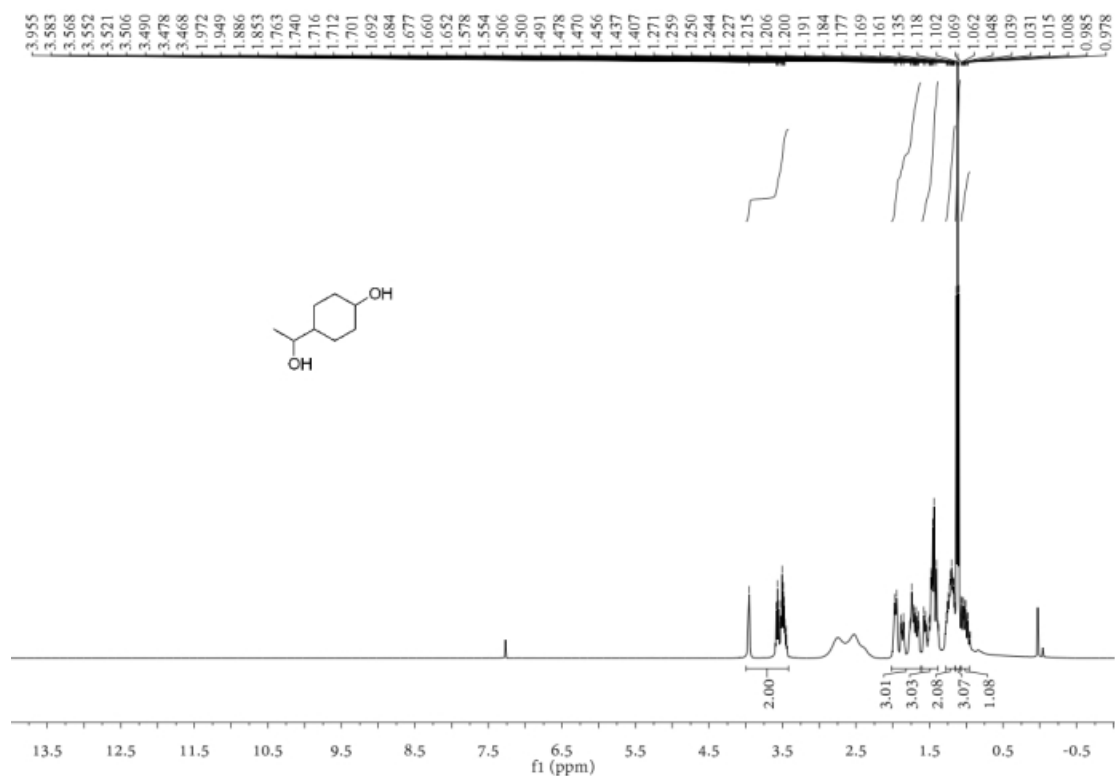

Fig. S55 <sup>1</sup>H NMR (400 MHz, CDCl<sub>3</sub>, 298 K) spectrum of compound 10y.

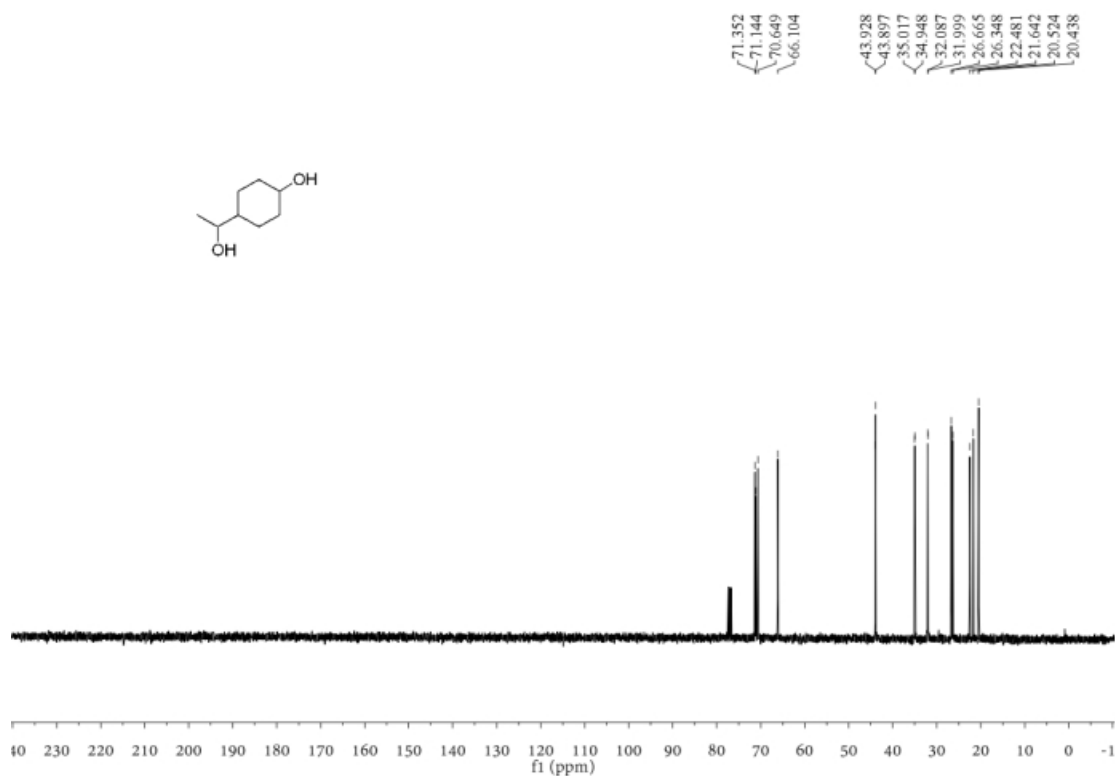

Fig. S56 <sup>13</sup>C NMR (101 MHz, CDCl<sub>3</sub>, 298 K) spectrum of compound 10y.

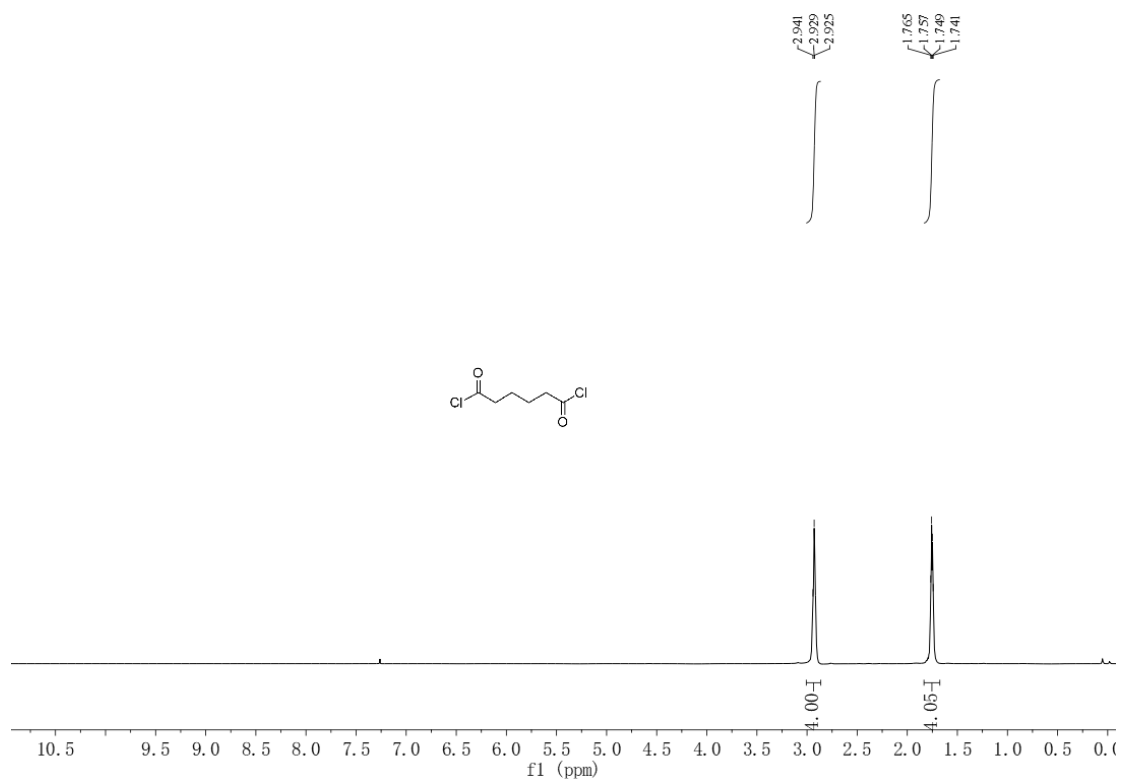

**Fig. S57**  $^1\text{H}$  NMR (400 MHz,  $\text{CDCl}_3$ , 298 K) spectrum of adipic chloride

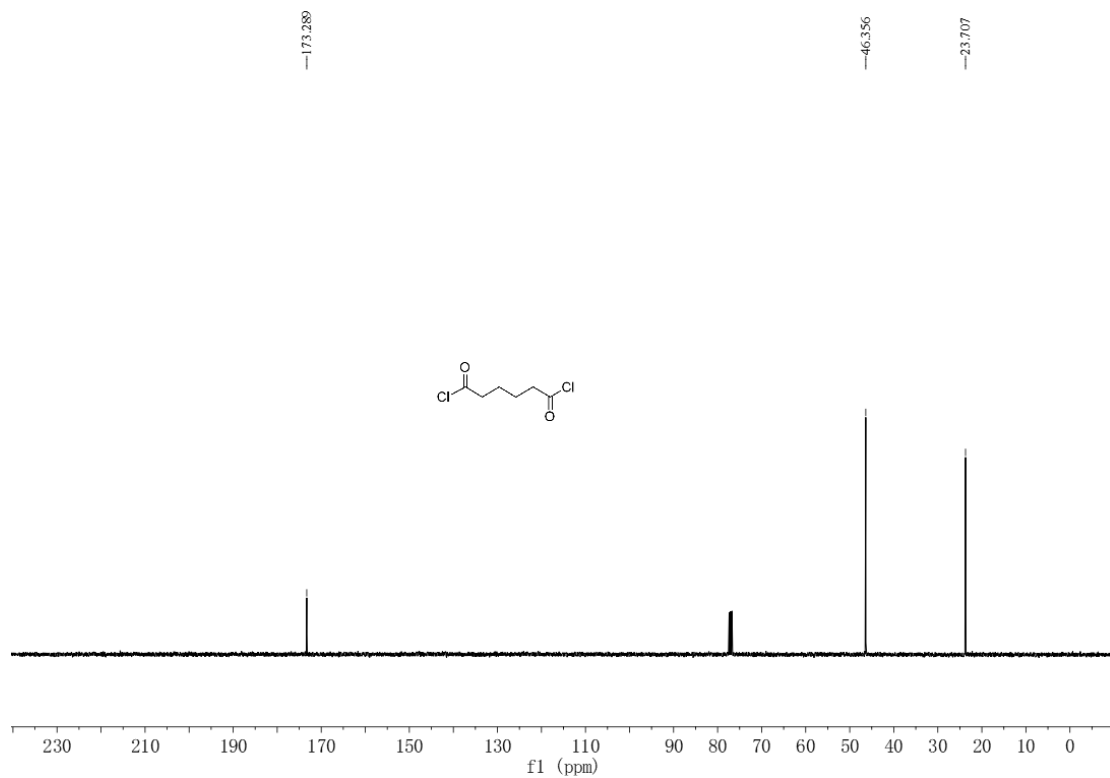

**Fig. S58**  $^{13}\text{C}$  NMR (101 MHz,  $\text{CDCl}_3$ , 298 K) spectrum of adipic chloride.

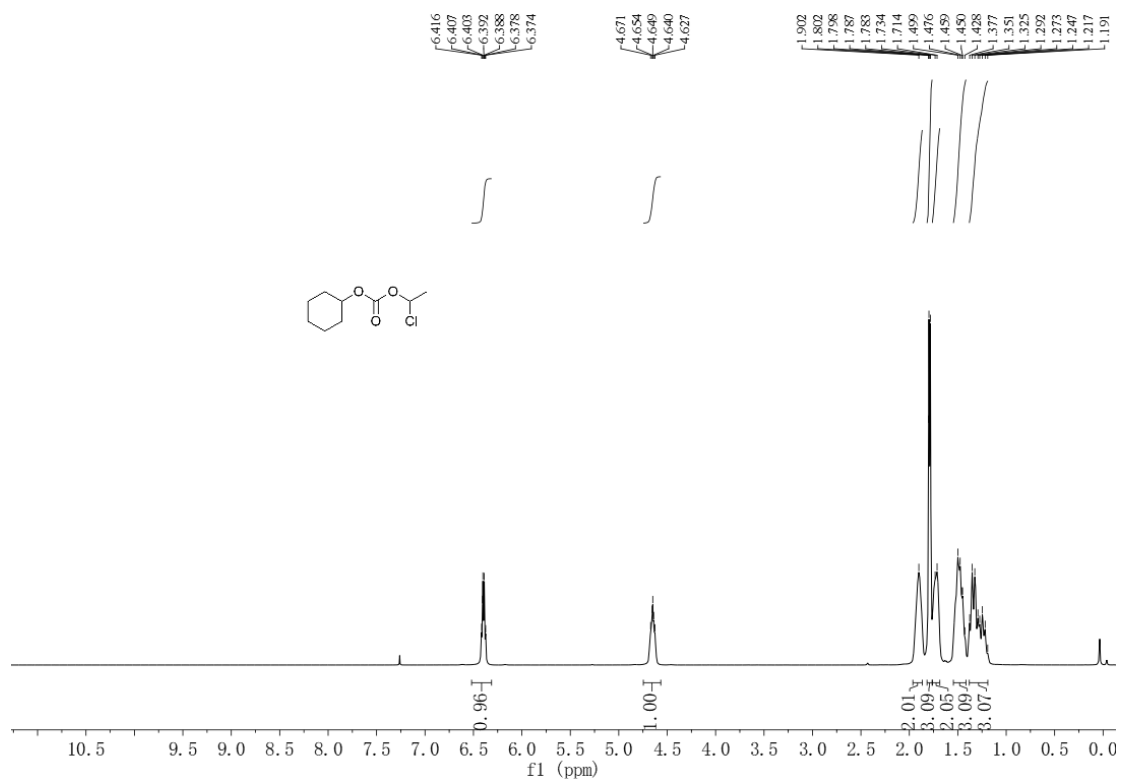

**Fig. S59**  $^1\text{H}$  NMR (400 MHz,  $\text{CDCl}_3$ , 298 K) spectrum of 1-chloroethylcyclohexyl carbonate

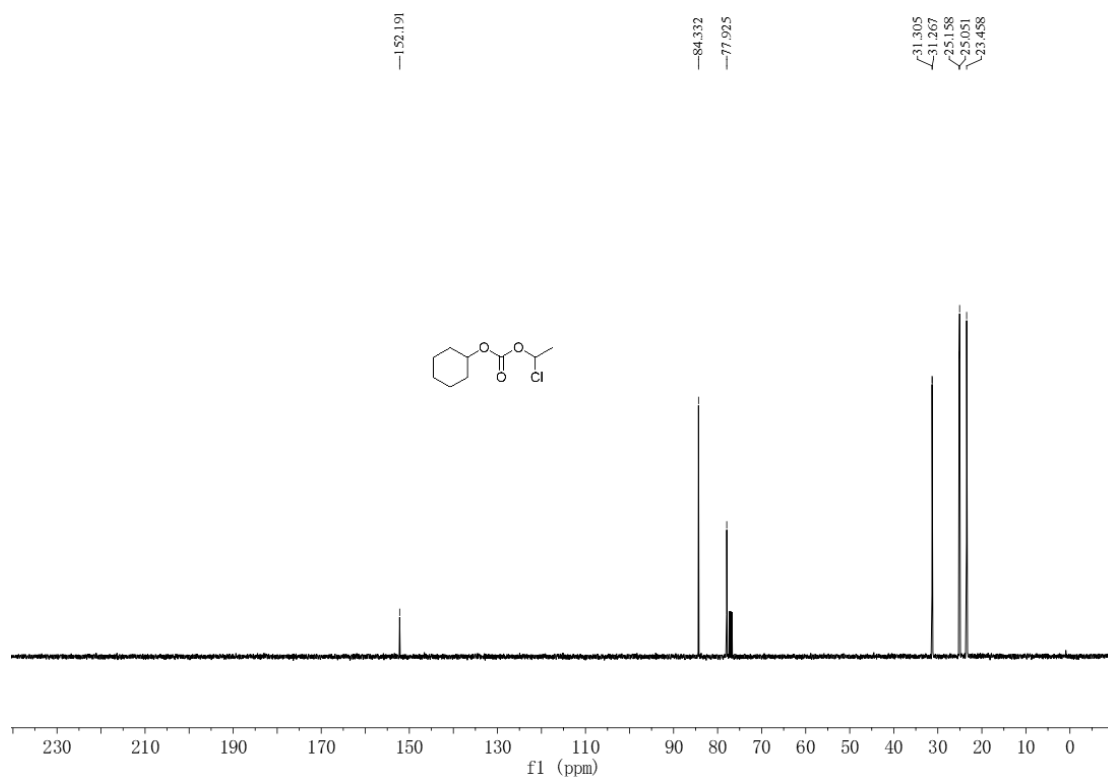

**Fig. S60**  $^{13}\text{C}$  NMR (101 MHz,  $\text{CDCl}_3$ , 298 K) spectrum of 1-chloroethylcyclohexyl carbonate.

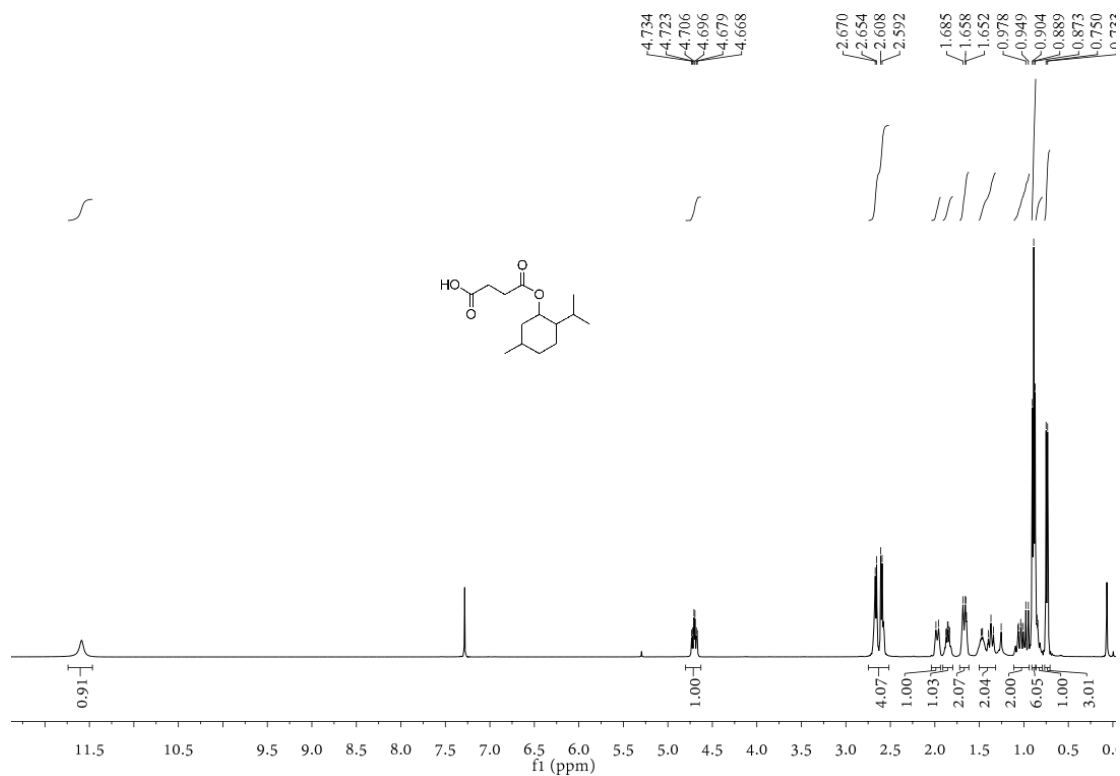

**Fig. S61**  $^1\text{H NMR}$  (400 MHz,  $\text{CDCl}_3$ , 298 K) spectrum of monomethyl succinate

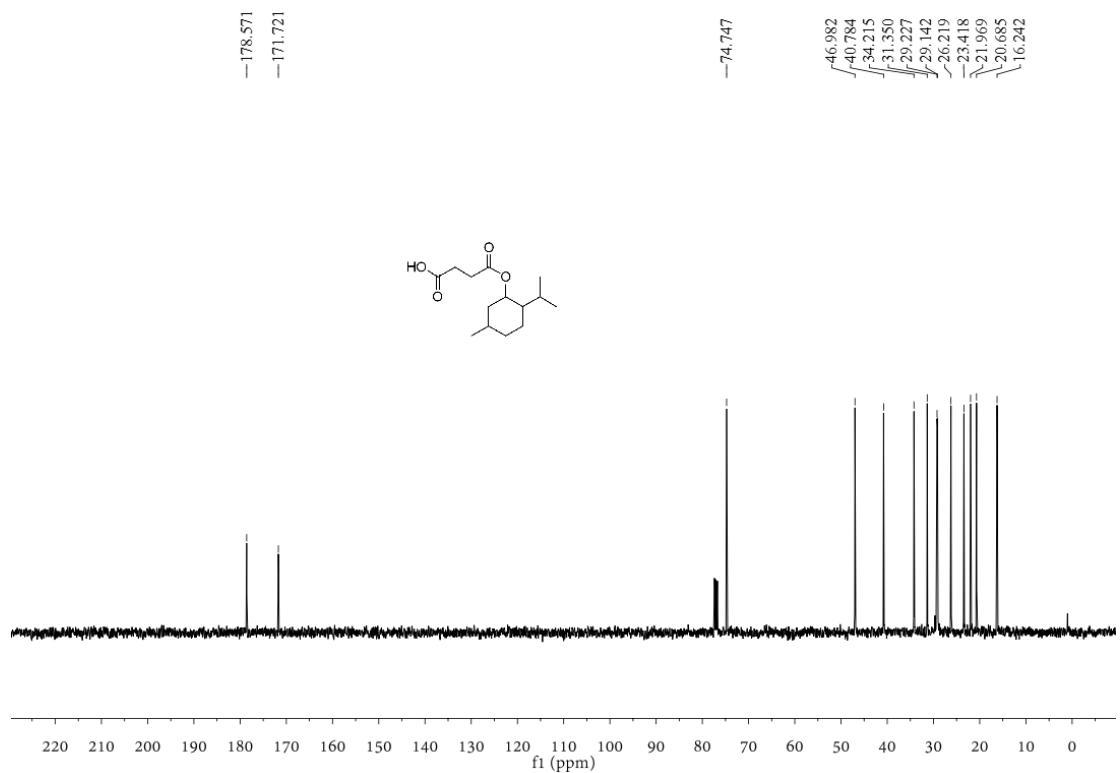

**Fig. S62**  $^{13}\text{C NMR}$  (101 MHz,  $\text{CDCl}_3$ , 298 K) spectrum of monomethyl succinate.

## 8. References

1. C. Qian, Q. Zheng, J. Chen, B. Tu and T. Tu, *Green Chem.*, 2023, **25**, 1368-1379.
2. H. Li, Y. Wang, Z. Lai and K. W. Huang, *ACS Catal.*, 2017, **7**, 4446–4450.
3. M. Wollenburg, A. Heusler, K. Bergander, and F. Glorius, *ACS Catal.*, 2020, **10**, 11365–11370.
4. X. Zhang, L. Ling, M. Luo and X. Zeng, *Angew. Chem. Int. Ed.*, 2019, **58**, 16785–16789.
5. Y. Wang, X. Cui, Y. Deng and F. Shi, *RSC Adv.*, 2014, **4**, 2729–2732.
6. J. Shi, M. Zhao, Y. Wang, J. Fu, X. Lu and Z. Hou, *J. Mater. Chem. A*, 2016, **4**, 5842-5848.
7. K. Leijondahl, A. B. Fransson and J. E. Bäckvall, *J. Org. Chem.*, 2006, **71**, 8622–8625.
8. T. Maegawa, A. Akashi, K. Yaguchi, Y. Iwasaki, M. Shigetsura, Y. Monguchi and H. Sajiki, *Chem. Eur. J.*, 2009, **15**, 6953-6963.
9. W. Qian, L. Lin, Y. Qiao, X. Zhao, Z. Xu, H. Gong, D. Li, M. Chen, R. Huang and Z. Hou, *Appl. Catal. A, Gen.*, 2019, **585**, 117183-117195.
10. C. Pinedo-Rivilla, M. C. Cafêu, J. A. Casatejada, Â. R. Araujo and I. J. Collado, *Tetrahedron-Asymmetry*, 2009, **20**, 2666–2672.
11. N. Kern, T. Dombay, A. Blanc, J. M. Weibel and P. Pale, *J. Org. Chem.*, 2012, **77**, 9227–9235.
12. J. G. Lee, S. Lee, H. Lee, J. F. Kurisingal, S. H. Han, Y. H. Kim and K. An, *Catal. Sci. Technol.*, 2022, **12**, 5021–5031.
13. A. Zep, K. Sitkowska, D. Pocięcha and E. Gorecka, *J. Mater. Chem. C*, 2014, **2**, 2323–2327.
14. M. Watanabe, N. Tada, M. Imanishi and M. Yamaoka, *J. Labelled Compd. Rad.*, 1988, **25**, 257-261.
15. S. S. Bharate and S. B. Bharate, *ACS Chem. Neurosci.*, 2012, **3**, 248–267.
